# Supplementary material for: Multi-Environment Genome-Wide Association Studies of Yield Traits in Common Bean (Phaseolus vulgaris L.) × Tepary Bean (P. acutifolius A. Gray) Interspecific Advanced Lines in Humid and Dry Colombian Caribbean Subregions
Source: MDPI journal article supplement (doi:10.3390/agronomy13051396), 2023-05-18
Supplement: s1 [file s1]

Chromosome 01

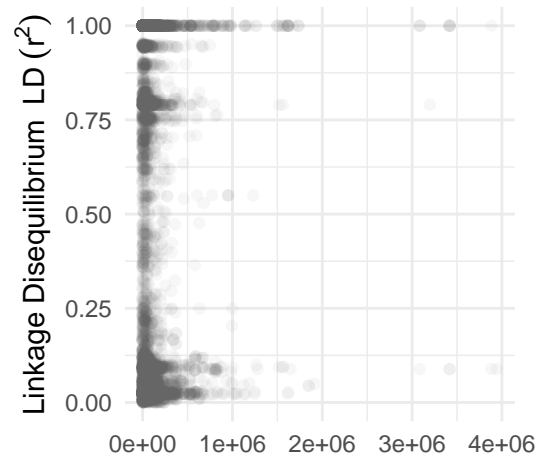

Chromosome 02

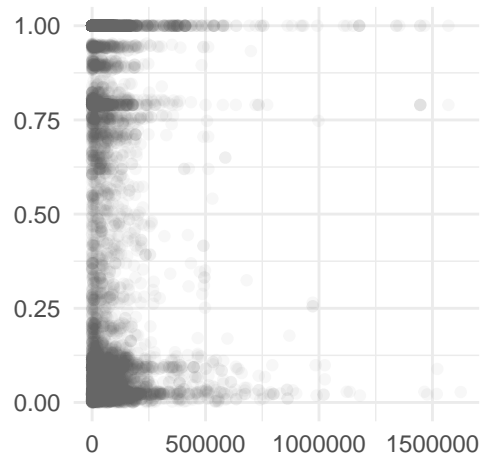

Chromosome 03

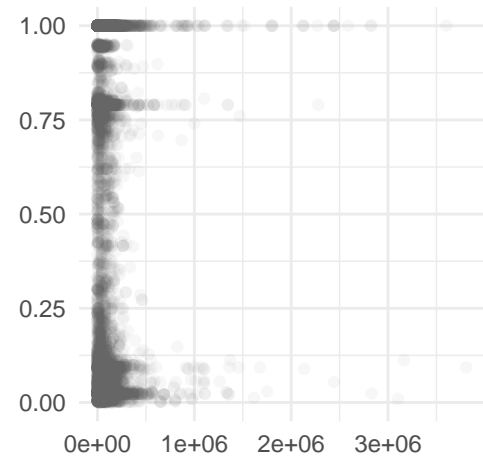

Chromosome 04

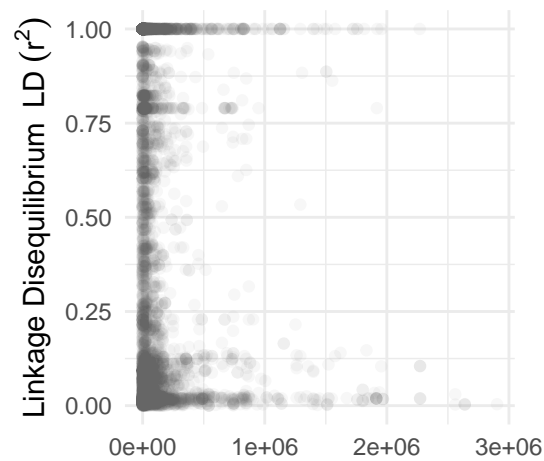

Chromosome 05

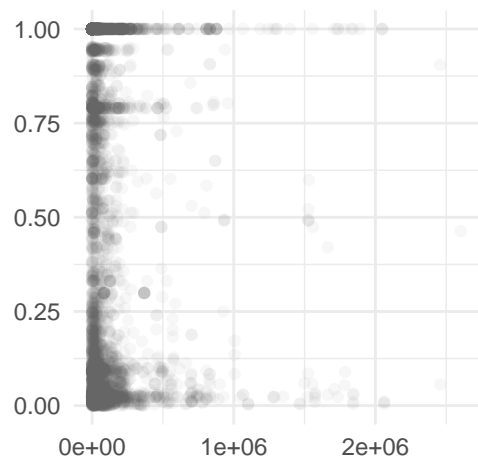

Chromosome 06

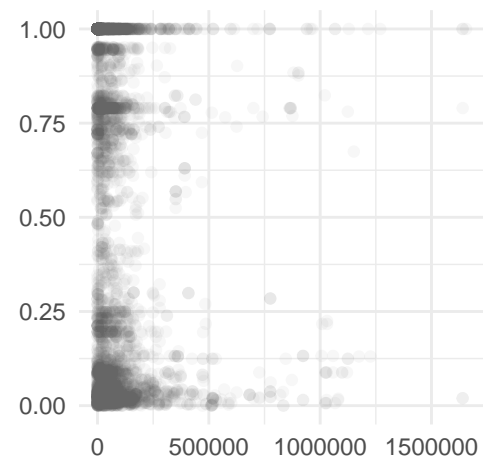

Chromosome 07

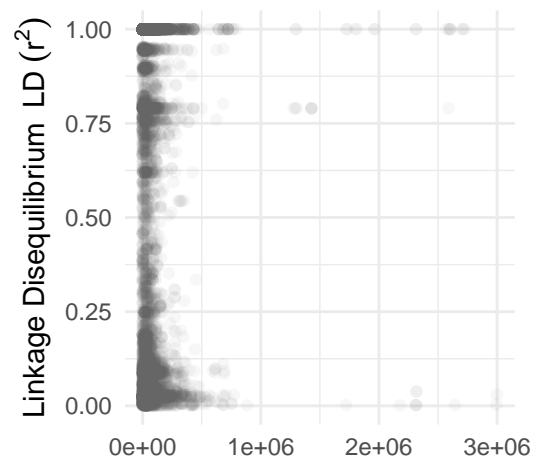

Chromosome 08

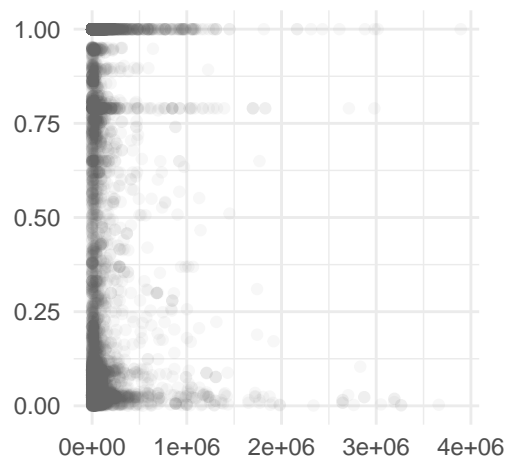

Chromosome 09

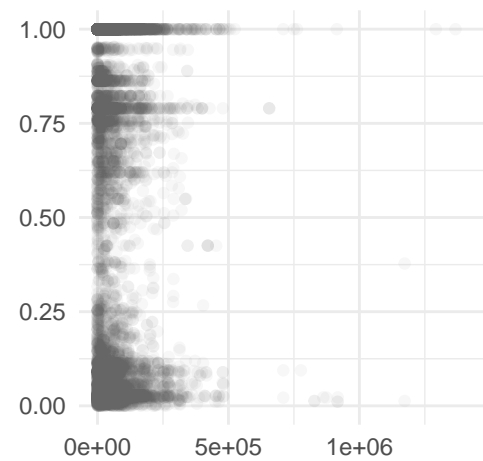

Chromosome 10

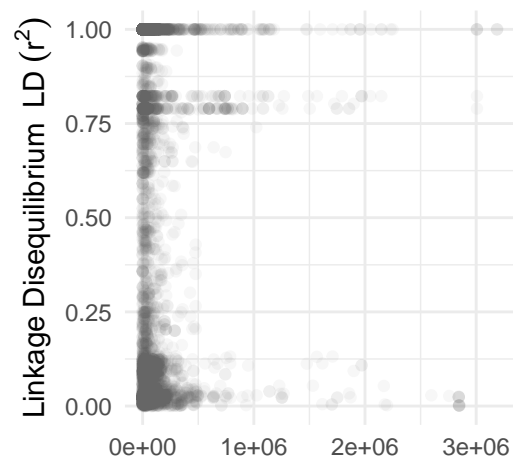

Chromosome 11

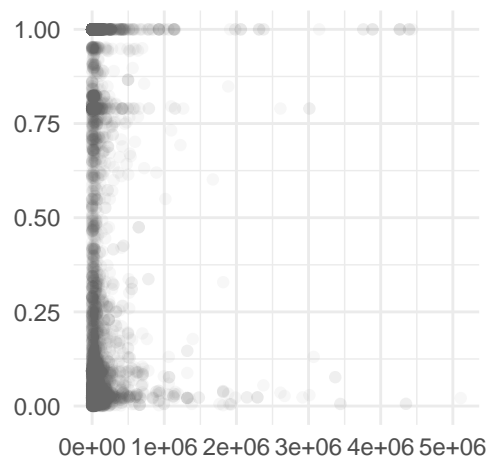

Physical distance
