# Supplementary material for: Multi-Environment Genome-Wide Association Studies of Yield Traits in Common Bean (Phaseolus vulgaris L.) × Tepary Bean (P. acutifolius A. Gray) Interspecific Advanced Lines in Humid and Dry Colombian Caribbean Subregions
Source: MDPI journal article supplement (doi:10.3390/agronomy13051396), 2023-05-18

**A** Research Station Turipana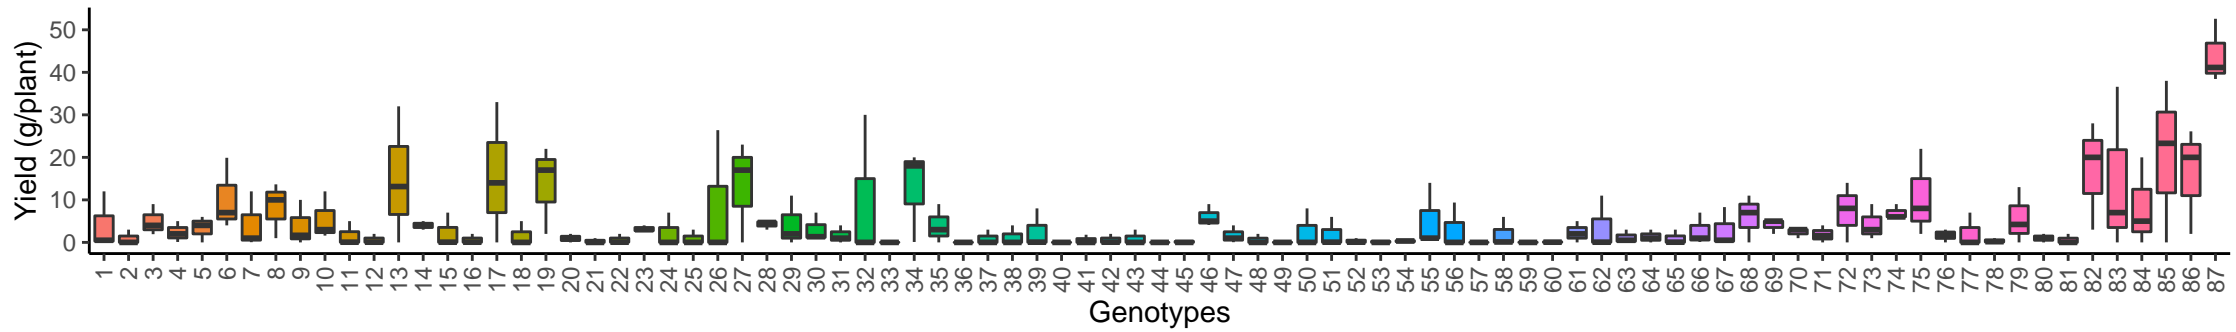**B** Research Station Motilonia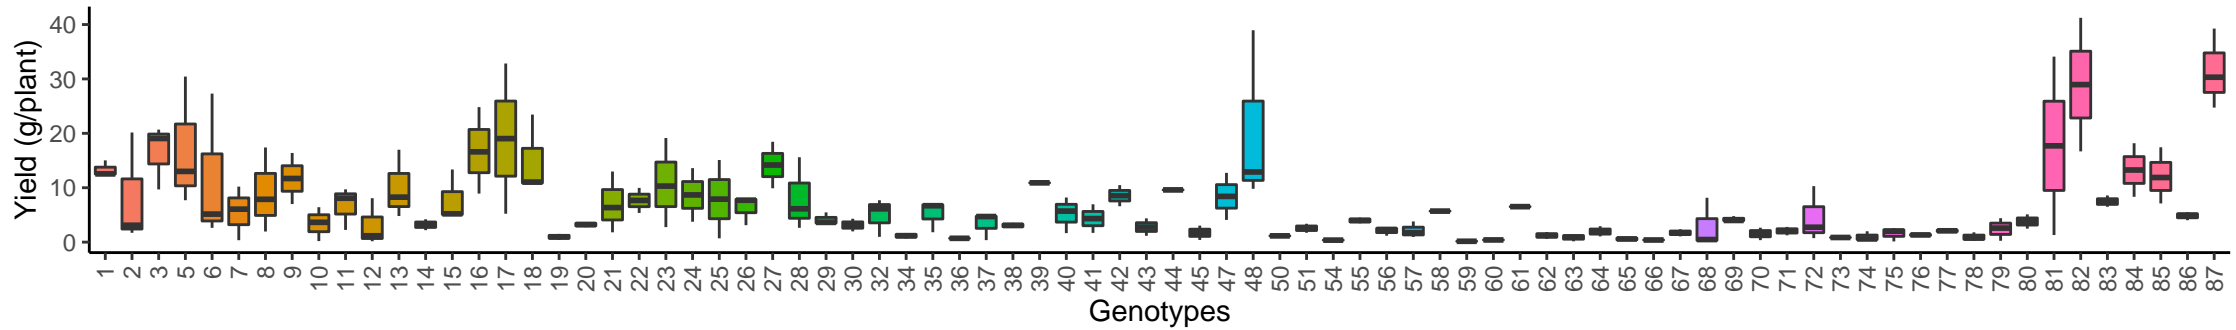**C** Research Station Carmen de Bolivar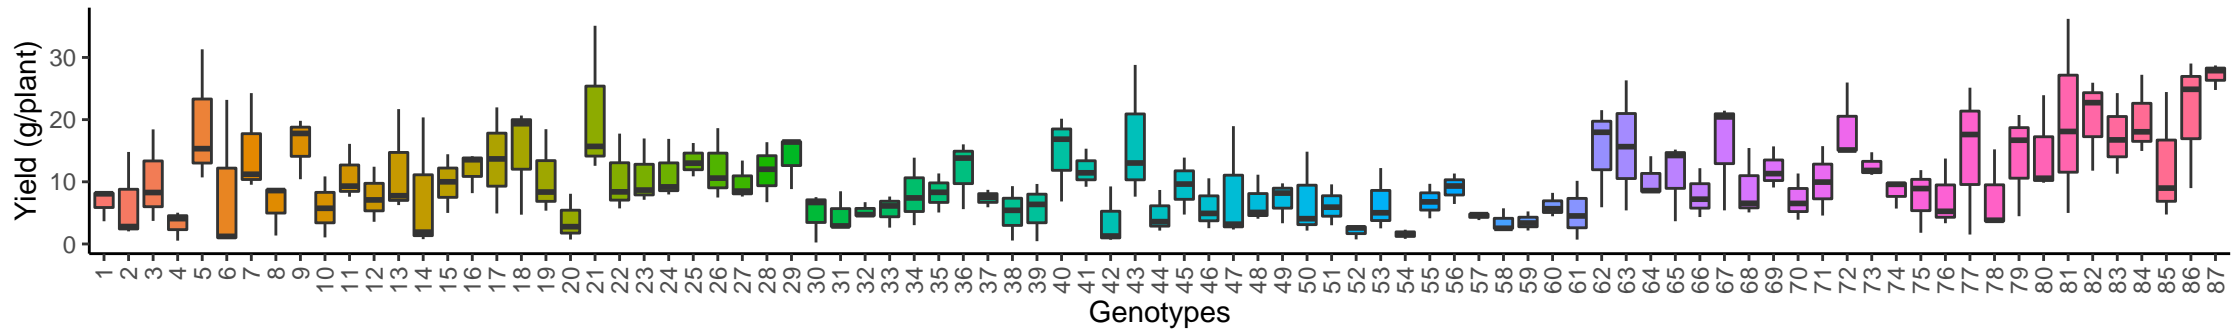**D** Research Station Caribia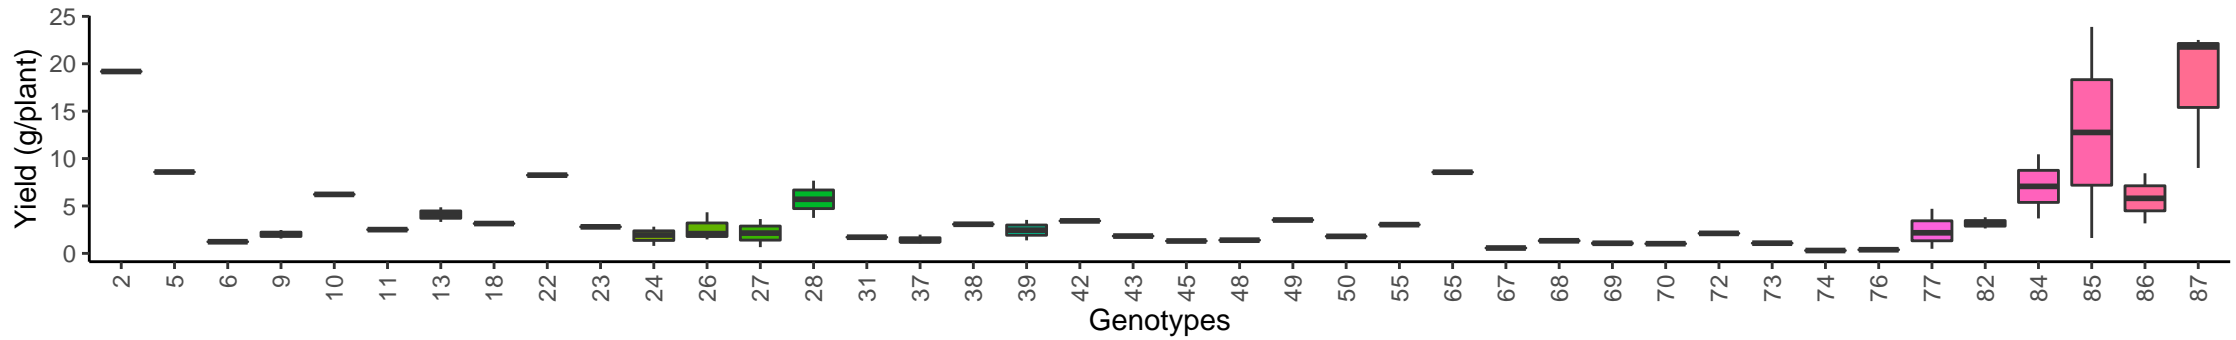

Supplement: s1 [file s1 › Figure S4.pdf]
