# Supplementary material for: Multi-Environment Genome-Wide Association Studies of Yield Traits in Common Bean (Phaseolus vulgaris L.) × Tepary Bean (P. acutifolius A. Gray) Interspecific Advanced Lines in Humid and Dry Colombian Caribbean Subregions
Source: MDPI journal article supplement (doi:10.3390/agronomy13051396), 2023-05-18
Supplement: s1 [file s1 › Table S7.xlsx]

## Sheet: Hoja1
Sample identification	BLUP	std.error_BLUP	location	Variable
G54	7.00653	2.36075	Carmen	BS
G52	7.25091	2.36075	Carmen	BS
G4	7.79173	2.36075	Carmen	BS
G58	7.96954	2.36075	Carmen	BS
G59	7.97345	2.36075	Carmen	BS
G42	8.04445	2.36075	Carmen	BS
G20	8.10232	2.36075	Carmen	BS
G57	8.49072	2.36075	Carmen	BS
G31	8.50408	2.36075	Carmen	BS
G30	8.56153	2.36075	Carmen	BS
G44	8.68087	2.36075	Carmen	BS
G38	8.69272	2.36075	Carmen	BS
G61	8.70779	2.36075	Carmen	BS
G32	8.78751	2.36075	Carmen	BS
G33	8.86954	2.36075	Carmen	BS
G39	8.88496	2.36075	Carmen	BS
G10	9.07581	2.36075	Carmen	BS
G46	9.1317	2.36075	Carmen	BS
G60	9.18412	2.36075	Carmen	BS
G51	9.21247	2.36075	Carmen	BS
G8	9.24933	2.36075	Carmen	BS
G2	9.39015	2.36075	Carmen	BS
G53	9.40716	2.36075	Carmen	BS
G1	9.44615	2.36075	Carmen	BS
G48	9.49324	2.36075	Carmen	BS
G55	9.54096	2.36075	Carmen	BS
G50	9.61895	2.36075	Carmen	BS
G49	9.6524	2.36075	Carmen	BS
G70	9.72966	2.36075	Carmen	BS
G37	9.78343	2.36075	Carmen	BS
G76	9.82167	2.36075	Carmen	BS
G78	9.86049	2.36075	Carmen	BS
G75	9.86283	2.36075	Carmen	BS
G14	9.93397	2.36075	Carmen	BS
G12	9.94143	2.36075	Carmen	BS
G66	10.0435	2.36075	Carmen	BS
G34	10.139	2.36075	Carmen	BS
G47	10.1616	2.36075	Carmen	BS
G35	10.2028	2.36075	Carmen	BS
G6	10.2802	2.36075	Carmen	BS
G74	10.2895	2.36075	Carmen	BS
G68	10.5758	2.36075	Carmen	BS
G56	10.5816	2.36075	Carmen	BS
G45	10.7687	2.36075	Carmen	BS
G15	10.9563	2.36075	Carmen	BS
G27	10.9747	2.36075	Carmen	BS
G71	11.0893	2.36075	Carmen	BS
G3	11.1142	2.36075	Carmen	BS
G64	11.2102	2.36075	Carmen	BS
G22	11.3434	2.36075	Carmen	BS
G19	11.3946	2.36075	Carmen	BS
G23	11.487	2.36075	Carmen	BS
G11	11.5283	2.36075	Carmen	BS
G65	11.5372	2.36075	Carmen	BS
G24	11.6935	2.36075	Carmen	BS
G87	11.7674	2.36075	Carmen	BS
G28	11.8645	2.36075	Carmen	BS
G36	11.9174	2.36075	Carmen	BS
G13	11.9595	2.36075	Carmen	BS
G16	11.9814	2.36075	Carmen	BS
G41	12.0021	2.36075	Carmen	BS
G69	12.0221	2.36075	Carmen	BS
G26	12.1175	2.36075	Carmen	BS
G73	12.2791	2.36075	Carmen	BS
G85	12.353	2.36075	Carmen	BS
G25	12.6655	2.36075	Carmen	BS
G17	12.7357	2.36075	Carmen	BS
G29	12.9226	2.36075	Carmen	BS
G79	12.9492	2.36075	Carmen	BS
G40	13.2596	2.36075	Carmen	BS
G77	13.3278	2.36075	Carmen	BS
G80	13.3413	2.36075	Carmen	BS
G18	13.3984	2.36075	Carmen	BS
G7	13.4463	2.36075	Carmen	BS
G62	13.5088	2.36075	Carmen	BS
G67	13.81	2.36075	Carmen	BS
G63	13.8231	2.36075	Carmen	BS
G9	13.925	2.36075	Carmen	BS
G43	14.1543	2.36075	Carmen	BS
G83	14.6136	2.36075	Carmen	BS
G72	15.2226	2.36075	Carmen	BS
G5	15.4189	2.36075	Carmen	BS
G81	15.7315	2.36075	Carmen	BS
G84	15.8783	2.36075	Carmen	BS
G82	15.9156	2.36075	Carmen	BS
G86	16.3051	2.36075	Carmen	BS
G21	16.3813	2.36075	Carmen	BS
G52	19.0306	4.71039	Carmen	NP
G42	19.5355	4.71039	Carmen	NP
G39	20.2927	4.71039	Carmen	NP
G47	20.9238	4.71039	Carmen	NP
G38	21.1762	4.71039	Carmen	NP
G44	21.1762	4.71039	Carmen	NP
G31	21.5548	4.71039	Carmen	NP
G51	21.5548	4.71039	Carmen	NP
G4	21.681	4.71039	Carmen	NP
G46	21.8072	4.71039	Carmen	NP
G43	21.9334	4.71039	Carmen	NP
G75	21.9334	4.71039	Carmen	NP
G20	22.0597	4.71039	Carmen	NP
G2	22.1859	4.71039	Carmen	NP
G37	22.3121	4.71039	Carmen	NP
G58	22.3121	4.71039	Carmen	NP
G71	22.5645	4.71039	Carmen	NP
G1	22.6907	4.71039	Carmen	NP
G54	22.6907	4.71039	Carmen	NP
G53	22.8169	4.71039	Carmen	NP
G60	23.1955	4.71039	Carmen	NP
G50	23.3218	4.71039	Carmen	NP
G55	23.3218	4.71039	Carmen	NP
G36	23.3218	4.71039	Carmen	NP
G65	23.448	4.71039	Carmen	NP
G76	23.7004	4.71039	Carmen	NP
G48	23.8266	4.71039	Carmen	NP
G57	23.8266	4.71039	Carmen	NP
G70	23.8266	4.71039	Carmen	NP
G19	24.2052	4.71039	Carmen	NP
G12	24.4576	4.71039	Carmen	NP
G22	24.4576	4.71039	Carmen	NP
G86	24.4576	4.71039	Carmen	NP
G63	24.8363	4.71039	Carmen	NP
G24	24.9625	4.71039	Carmen	NP
G28	24.9625	4.71039	Carmen	NP
G41	24.9625	4.71039	Carmen	NP
G6	24.9625	4.71039	Carmen	NP
G78	24.9625	4.71039	Carmen	NP
G40	25.0887	4.71039	Carmen	NP
G32	25.2149	4.71039	Carmen	NP
G34	25.2149	4.71039	Carmen	NP
G56	25.2149	4.71039	Carmen	NP
G74	25.2149	4.71039	Carmen	NP
G49	25.5935	4.71039	Carmen	NP
G33	25.5935	4.71039	Carmen	NP
G72	25.5935	4.71039	Carmen	NP
G80	25.5935	4.71039	Carmen	NP
G15	25.7197	4.71039	Carmen	NP
G35	25.7197	4.71039	Carmen	NP
G29	25.8459	4.71039	Carmen	NP
G62	25.8459	4.71039	Carmen	NP
G69	25.8459	4.71039	Carmen	NP
G30	25.9721	4.71039	Carmen	NP
G59	26.477	4.71039	Carmen	NP
G64	26.477	4.71039	Carmen	NP
G16	26.7294	4.71039	Carmen	NP
G3	26.7294	4.71039	Carmen	NP
G82	26.7294	4.71039	Carmen	NP
G73	26.8556	4.71039	Carmen	NP
G77	26.8556	4.71039	Carmen	NP
G13	26.9818	4.71039	Carmen	NP
G61	26.9818	4.71039	Carmen	NP
G68	27.2342	4.71039	Carmen	NP
G10	27.3605	4.71039	Carmen	NP
G26	27.3605	4.71039	Carmen	NP
G9	27.3605	4.71039	Carmen	NP
G83	27.6129	4.71039	Carmen	NP
G17	27.9915	4.71039	Carmen	NP
G23	27.9915	4.71039	Carmen	NP
G27	28.1177	4.71039	Carmen	NP
G5	28.1177	4.71039	Carmen	NP
G79	28.2439	4.71039	Carmen	NP
G85	28.4963	4.71039	Carmen	NP
G11	28.7488	4.71039	Carmen	NP
G14	29.1274	4.71039	Carmen	NP
G7	29.7584	4.71039	Carmen	NP
G66	29.8846	4.71039	Carmen	NP
G84	30.6419	4.71039	Carmen	NP
G18	30.7681	4.71039	Carmen	NP
G87	30.8943	4.71039	Carmen	NP
G81	31.6516	4.71039	Carmen	NP
G45	31.7778	4.71039	Carmen	NP
G8	32.6612	4.71039	Carmen	NP
G67	33.6709	4.71039	Carmen	NP
G25	34.933	4.71039	Carmen	NP
G21	42.758	4.71039	Carmen	NP
G54	2.6719	0.38272	Carmen	NS
G57	2.87903	0.38272	Carmen	NS
G42	2.93081	0.38272	Carmen	NS
G4	2.94807	0.38272	Carmen	NS
G30	2.9826	0.38272	Carmen	NS
G44	3.08616	0.38272	Carmen	NS
G50	3.13795	0.38272	Carmen	NS
G38	3.29329	0.38272	Carmen	NS
G52	3.32782	0.38272	Carmen	NS
G46	3.34508	0.38272	Carmen	NS
G39	3.37097	0.38272	Carmen	NS
G55	3.39686	0.38272	Carmen	NS
G48	3.44864	0.38272	Carmen	NS
G6	3.44864	0.38272	Carmen	NS
G43	3.4659	0.38272	Carmen	NS
G53	3.50043	0.38272	Carmen	NS
G58	3.50043	0.38272	Carmen	NS
G14	3.55221	0.38272	Carmen	NS
G2	3.55221	0.38272	Carmen	NS
G51	3.60399	0.38272	Carmen	NS
G49	3.60399	0.38272	Carmen	NS
G20	3.65577	0.38272	Carmen	NS
G56	3.65577	0.38272	Carmen	NS
G10	3.65577	0.38272	Carmen	NS
G32	3.65577	0.38272	Carmen	NS
G36	3.65577	0.38272	Carmen	NS
G31	3.70756	0.38272	Carmen	NS
G45	3.70756	0.38272	Carmen	NS
G47	3.70756	0.38272	Carmen	NS
G34	3.75934	0.38272	Carmen	NS
G35	3.81112	0.38272	Carmen	NS
G29	3.86291	0.38272	Carmen	NS
G37	3.86291	0.38272	Carmen	NS
G61	3.91469	0.38272	Carmen	NS
G12	3.96647	0.38272	Carmen	NS
G33	3.96647	0.38272	Carmen	NS
G8	3.96647	0.38272	Carmen	NS
G75	4.01825	0.38272	Carmen	NS
G76	4.01825	0.38272	Carmen	NS
G40	4.1736	0.38272	Carmen	NS
G73	4.1736	0.38272	Carmen	NS
G78	4.27717	0.38272	Carmen	NS
G74	4.27717	0.38272	Carmen	NS
G15	4.27717	0.38272	Carmen	NS
G17	4.27717	0.38272	Carmen	NS
G59	4.27717	0.38272	Carmen	NS
G77	4.38073	0.38272	Carmen	NS
G79	4.38073	0.38272	Carmen	NS
G80	4.38073	0.38272	Carmen	NS
G60	4.43252	0.38272	Carmen	NS
G41	4.4843	0.38272	Carmen	NS
G66	4.4843	0.38272	Carmen	NS
G71	4.4843	0.38272	Carmen	NS
G64	4.58787	0.38272	Carmen	NS
G81	4.58787	0.38272	Carmen	NS
G1	4.63965	0.38272	Carmen	NS
G16	4.63965	0.38272	Carmen	NS
G65	4.63965	0.38272	Carmen	NS
G70	4.63965	0.38272	Carmen	NS
G9	4.63965	0.38272	Carmen	NS
G18	4.69143	0.38272	Carmen	NS
G68	4.69143	0.38272	Carmen	NS
G19	4.74321	0.38272	Carmen	NS
G27	4.74321	0.38272	Carmen	NS
G22	4.74321	0.38272	Carmen	NS
G24	4.74321	0.38272	Carmen	NS
G13	4.795	0.38272	Carmen	NS
G63	4.795	0.38272	Carmen	NS
G7	4.795	0.38272	Carmen	NS
G21	4.84678	0.38272	Carmen	NS
G23	4.84678	0.38272	Carmen	NS
G28	4.89856	0.38272	Carmen	NS
G86	4.89856	0.38272	Carmen	NS
G25	4.89856	0.38272	Carmen	NS
G26	4.95035	0.38272	Carmen	NS
G3	5.00213	0.38272	Carmen	NS
G72	5.00213	0.38272	Carmen	NS
G67	5.05391	0.38272	Carmen	NS
G85	5.10569	0.38272	Carmen	NS
G84	5.15748	0.38272	Carmen	NS
G82	5.31283	0.38272	Carmen	NS
G11	5.31283	0.38272	Carmen	NS
G69	5.31283	0.38272	Carmen	NS
G62	5.36461	0.38272	Carmen	NS
G87	5.46817	0.38272	Carmen	NS
G5	5.51996	0.38272	Carmen	NS
G83	5.72709	0.38272	Carmen	NS
G42	52.4463	15.4066	Carmen	VB
G46	54.4301	15.4066	Carmen	VB
G39	54.4962	15.4066	Carmen	VB
G51	54.8269	15.4066	Carmen	VB
G55	56.0172	15.4066	Carmen	VB
G47	56.1494	15.4066	Carmen	VB
G34	56.1759	15.4066	Carmen	VB
G52	56.2817	15.4066	Carmen	VB
G6	56.2817	15.4066	Carmen	VB
G2	57.8688	15.4066	Carmen	VB
G38	57.8688	15.4066	Carmen	VB
G31	58.1333	15.4066	Carmen	VB
G15	58.2655	15.4066	Carmen	VB
G24	58.2655	15.4066	Carmen	VB
G22	58.3978	15.4066	Carmen	VB
G58	58.9268	15.4066	Carmen	VB
G83	59.4558	15.4066	Carmen	VB
G57	59.9849	15.4066	Carmen	VB
G48	60.1171	15.4066	Carmen	VB
G28	60.5139	15.4066	Carmen	VB
G27	60.6461	15.4066	Carmen	VB
G75	60.7784	15.4066	Carmen	VB
G10	61.1752	15.4066	Carmen	VB
G86	61.3603	15.4066	Carmen	VB
G1	62.101	15.4066	Carmen	VB
G23	62.4977	15.4066	Carmen	VB
G44	62.7622	15.4066	Carmen	VB
G53	64.8783	15.4066	Carmen	VB
G37	65.0106	15.4066	Carmen	VB
G49	65.0106	15.4066	Carmen	VB
G40	65.8041	15.4066	Carmen	VB
G43	66.5686	15.4066	Carmen	VB
G12	66.9944	15.4066	Carmen	VB
G19	67.1267	15.4066	Carmen	VB
G41	67.1267	15.4066	Carmen	VB
G26	67.6557	15.4066	Carmen	VB
G45	67.788	15.4066	Carmen	VB
G25	67.9202	15.4066	Carmen	VB
G3	68.5815	15.4066	Carmen	VB
G36	69.1105	15.4066	Carmen	VB
G60	69.5073	15.4066	Carmen	VB
G9	69.7189	15.4066	Carmen	VB
G33	69.7718	15.4066	Carmen	VB
G82	70.5654	15.4066	Carmen	VB
G13	70.8299	15.4066	Carmen	VB
G61	71.0944	15.4066	Carmen	VB
G5	71.3589	15.4066	Carmen	VB
G76	71.3589	15.4066	Carmen	VB
G18	71.4911	15.4066	Carmen	VB
G85	72.5492	15.4066	Carmen	VB
G32	72.8137	15.4066	Carmen	VB
G64	73.0782	15.4066	Carmen	VB
G70	73.2105	15.4066	Carmen	VB
G50	73.2991	15.4066	Carmen	VB
G14	74.1363	15.4066	Carmen	VB
G71	74.1363	15.4066	Carmen	VB
G16	74.2685	15.4066	Carmen	VB
G81	74.9298	15.4066	Carmen	VB
G4	75.7233	15.4066	Carmen	VB
G17	76.5169	15.4066	Carmen	VB
G72	76.5169	15.4066	Carmen	VB
G56	77.3104	15.4066	Carmen	VB
G65	77.4427	15.4066	Carmen	VB
G66	77.4427	15.4066	Carmen	VB
G73	78.2362	15.4066	Carmen	VB
G54	79.162	15.4066	Carmen	VB
G8	79.162	15.4066	Carmen	VB
G87	79.7704	15.4066	Carmen	VB
G29	81.4104	15.4066	Carmen	VB
G35	81.6749	15.4066	Carmen	VB
G30	81.9394	15.4066	Carmen	VB
G62	83.6587	15.4066	Carmen	VB
G78	84.1877	15.4066	Carmen	VB
G84	85.2458	15.4066	Carmen	VB
G79	86.0393	15.4066	Carmen	VB
G77	86.5683	15.4066	Carmen	VB
G74	86.8329	15.4066	Carmen	VB
G63	87.2296	15.4066	Carmen	VB
G7	87.3619	15.4066	Carmen	VB
G20	88.949	15.4066	Carmen	VB
G59	89.8747	15.4066	Carmen	VB
G69	89.8747	15.4066	Carmen	VB
G68	92.3876	15.4066	Carmen	VB
G80	99.5294	15.4066	Carmen	VB
G21	100.323	15.4066	Carmen	VB
G67	103.497	15.4066	Carmen	VB
G11	113.813	15.4066	Carmen	VB
G54	6.51697	2.52429	Carmen	YLP
G52	6.79535	2.52429	Carmen	YLP
G4	7.41141	2.52429	Carmen	YLP
G58	7.61396	2.52429	Carmen	YLP
G59	7.61842	2.52429	Carmen	YLP
G42	7.6993	2.52429	Carmen	YLP
G20	7.76522	2.52429	Carmen	YLP
G57	8.10931	2.52429	Carmen	YLP
G31	8.22288	2.52429	Carmen	YLP
G44	8.28403	2.52429	Carmen	YLP
G30	8.28832	2.52429	Carmen	YLP
G38	8.43776	2.52429	Carmen	YLP
G61	8.45493	2.52429	Carmen	YLP
G32	8.54573	2.52429	Carmen	YLP
G33	8.63918	2.52429	Carmen	YLP
G39	8.65675	2.52429	Carmen	YLP
G10	8.87415	2.52429	Carmen	YLP
G46	8.93781	2.52429	Carmen	YLP
G60	8.99753	2.52429	Carmen	YLP
G51	9.02982	2.52429	Carmen	YLP
G8	9.07181	2.52429	Carmen	YLP
G2	9.23222	2.52429	Carmen	YLP
G53	9.2516	2.52429	Carmen	YLP
G1	9.29601	2.52429	Carmen	YLP
G48	9.34966	2.52429	Carmen	YLP
G55	9.40401	2.52429	Carmen	YLP
G50	9.49286	2.52429	Carmen	YLP
G49	9.53096	2.52429	Carmen	YLP
G70	9.61896	2.52429	Carmen	YLP
G37	9.68022	2.52429	Carmen	YLP
G76	9.72378	2.52429	Carmen	YLP
G78	9.768	2.52429	Carmen	YLP
G75	9.77067	2.52429	Carmen	YLP
G14	9.8517	2.52429	Carmen	YLP
G12	9.8602	2.52429	Carmen	YLP
G66	9.97646	2.52429	Carmen	YLP
G34	10.0853	2.52429	Carmen	YLP
G47	10.111	2.52429	Carmen	YLP
G35	10.1579	2.52429	Carmen	YLP
G6	10.2461	2.52429	Carmen	YLP
G74	10.2566	2.52429	Carmen	YLP
G68	10.5828	2.52429	Carmen	YLP
G56	10.5895	2.52429	Carmen	YLP
G45	10.8025	2.52429	Carmen	YLP
G15	11.0163	2.52429	Carmen	YLP
G27	11.0372	2.52429	Carmen	YLP
G71	11.1678	2.52429	Carmen	YLP
G3	11.1962	2.52429	Carmen	YLP
G64	11.3055	2.52429	Carmen	YLP
G22	11.4573	2.52429	Carmen	YLP
G19	11.5156	2.52429	Carmen	YLP
G23	11.6208	2.52429	Carmen	YLP
G11	11.6679	2.52429	Carmen	YLP
G65	11.6779	2.52429	Carmen	YLP
G24	11.8561	2.52429	Carmen	YLP
G28	12.0508	2.52429	Carmen	YLP
G36	12.1111	2.52429	Carmen	YLP
G13	12.159	2.52429	Carmen	YLP
G16	12.184	2.52429	Carmen	YLP
G41	12.2076	2.52429	Carmen	YLP
G69	12.2303	2.52429	Carmen	YLP
G26	12.339	2.52429	Carmen	YLP
G73	12.5231	2.52429	Carmen	YLP
G85	12.6073	2.52429	Carmen	YLP
G25	12.9632	2.52429	Carmen	YLP
G17	13.0433	2.52429	Carmen	YLP
G29	13.2562	2.52429	Carmen	YLP
G79	13.2865	2.52429	Carmen	YLP
G40	13.6401	2.52429	Carmen	YLP
G77	13.7177	2.52429	Carmen	YLP
G80	13.7331	2.52429	Carmen	YLP
G18	13.7981	2.52429	Carmen	YLP
G7	13.8527	2.52429	Carmen	YLP
G62	13.924	2.52429	Carmen	YLP
G67	14.267	2.52429	Carmen	YLP
G63	14.2819	2.52429	Carmen	YLP
G9	14.398	2.52429	Carmen	YLP
G43	14.6592	2.52429	Carmen	YLP
G83	15.1824	2.52429	Carmen	YLP
G72	15.8761	2.52429	Carmen	YLP
G5	16.0997	2.52429	Carmen	YLP
G81	16.4559	2.52429	Carmen	YLP
G84	16.6231	2.52429	Carmen	YLP
G82	16.6656	2.52429	Carmen	YLP
G86	17.1092	2.52429	Carmen	YLP
G21	17.196	2.52429	Carmen	YLP
G87	20.4732	2.52429	Carmen	YLP
G77	5.92185	0.978921	Caribia	BS
G68	5.94191	0.978921	Caribia	BS
G37	5.96449	0.962445	Caribia	BS
G76	5.97833	0.978921	Caribia	BS
G69	5.99456	0.978921	Caribia	BS
G45	6.00182	0.978921	Caribia	BS
G6	6.02426	0.978921	Caribia	BS
G74	6.04678	0.946773	Caribia	BS
G39	6.05119	0.946773	Caribia	BS
G27	6.05286	0.962445	Caribia	BS
G24	6.05397	0.962445	Caribia	BS
G73	6.05879	0.978921	Caribia	BS
G70	6.07164	0.946773	Caribia	BS
G67	6.07254	0.978921	Caribia	BS
G50	6.10583	0.962445	Caribia	BS
G9	6.11628	0.978921	Caribia	BS
G48	6.12344	0.978921	Caribia	BS
G86	6.13518	0.978921	Caribia	BS
G55	6.14105	0.978921	Caribia	BS
G23	6.14195	0.962445	Caribia	BS
G43	6.15037	0.978921	Caribia	BS
G38	6.15128	0.978921	Caribia	BS
G72	6.18857	0.978921	Caribia	BS
G31	6.24555	0.978921	Caribia	BS
G42	6.2459	0.978921	Caribia	BS
G65	6.25598	0.978921	Caribia	BS
G10	6.26005	0.962445	Caribia	BS
G13	6.26315	0.978921	Caribia	BS
G26	6.26942	0.978921	Caribia	BS
G18	6.30944	0.978921	Caribia	BS
G11	6.32055	0.978921	Caribia	BS
G5	6.34155	0.978921	Caribia	BS
G2	6.3689	0.978921	Caribia	BS
G82	6.38247	0.946773	Caribia	BS
G84	6.41597	0.946773	Caribia	BS
G28	6.44868	0.962445	Caribia	BS
G22	6.55088	0.962445	Caribia	BS
G49	6.67806	0.962445	Caribia	BS
G85	6.7071	0.946773	Caribia	BS
G87	6.96519	0.962445	Caribia	BS
G69	8.38559	4.14573	Caribia	NP
G76	8.38559	4.14573	Caribia	NP
G68	8.39567	3.66418	Caribia	NP
G45	9.50605	4.14573	Caribia	NP
G37	9.52131	4.14573	Caribia	NP
G73	9.78616	4.14573	Caribia	NP
G67	9.81336	4.14573	Caribia	NP
G70	10.159	3.319	Caribia	NP
G74	10.159	3.319	Caribia	NP
G86	10.5839	3.66418	Caribia	NP
G77	10.5985	3.66418	Caribia	NP
G6	10.6265	4.14573	Caribia	NP
G9	10.635	3.319	Caribia	NP
G55	10.7192	4.14573	Caribia	NP
G23	10.9338	3.66418	Caribia	NP
G43	10.9993	4.14573	Caribia	NP
G48	11.2794	4.14573	Caribia	NP
G38	11.494	4.14573	Caribia	NP
G39	11.5103	4.14573	Caribia	NP
G27	11.7291	3.66418	Caribia	NP
G31	11.7741	4.14573	Caribia	NP
G50	11.8396	4.14573	Caribia	NP
G24	11.8552	4.14573	Caribia	NP
G82	12.0348	4.14573	Caribia	NP
G42	12.0543	4.14573	Caribia	NP
G72	12.3344	4.14573	Caribia	NP
G26	12.3938	3.66418	Caribia	NP
G84	13.2821	4.14573	Caribia	NP
G65	13.4276	4.14573	Caribia	NP
G18	13.7349	4.14573	Caribia	NP
G5	13.7349	4.14573	Caribia	NP
G11	13.9879	4.14573	Caribia	NP
G85	14.1361	4.14573	Caribia	NP
G13	14.7926	3.319	Caribia	NP
G2	14.8282	3.319	Caribia	NP
G10	15.4156	3.66418	Caribia	NP
G22	17.3492	3.66418	Caribia	NP
G49	17.4184	3.66418	Caribia	NP
G28	17.4397	3.319	Caribia	NP
G87	22.8068	3.66418	Caribia	NP
G77	2.25963	0.475334	Caribia	NS
G10	2.46178	0.475334	Caribia	NS
G38	2.46178	0.419968	Caribia	NS
G37	2.50552	0.475334	Caribia	NS
G39	2.52103	0.475334	Caribia	NS
G6	2.53366	0.475334	Caribia	NS
G55	2.56237	0.475334	Caribia	NS
G50	2.57642	0.380316	Caribia	NS
G76	2.58987	0.380316	Caribia	NS
G31	2.63041	0.419968	Caribia	NS
G43	2.63263	0.419968	Caribia	NS
G70	2.63263	0.475334	Caribia	NS
G74	2.63263	0.380316	Caribia	NS
G65	2.64608	0.475334	Caribia	NS
G13	2.65266	0.419968	Caribia	NS
G72	2.68662	0.475334	Caribia	NS
G73	2.73039	0.475334	Caribia	NS
G68	2.73868	0.475334	Caribia	NS
G27	2.78429	0.475334	Caribia	NS
G85	2.78429	0.419968	Caribia	NS
G26	2.83536	0.475334	Caribia	NS
G23	2.85524	0.475334	Caribia	NS
G67	2.85524	0.475334	Caribia	NS
G48	2.85747	0.475334	Caribia	NS
G45	2.87091	0.475334	Caribia	NS
G42	2.91145	0.475334	Caribia	NS
G18	2.96766	0.419968	Caribia	NS
G9	2.97077	0.475334	Caribia	NS
G24	2.9793	0.475334	Caribia	NS
G22	2.98333	0.475334	Caribia	NS
G5	3.08008	0.475334	Caribia	NS
G86	3.0897	0.475334	Caribia	NS
G49	3.09144	0.475334	Caribia	NS
G2	3.09575	0.380316	Caribia	NS
G84	3.21084	0.380316	Caribia	NS
G82	3.23118	0.419968	Caribia	NS
G11	3.26438	0.419968	Caribia	NS
G28	3.34247	0.419968	Caribia	NS
G69	3.433	0.380316	Caribia	NS
G87	4.0588	0.419968	Caribia	NS
G76	7.94632	4.31764	Caribia	VB
G69	8.07336	4.31764	Caribia	VB
G37	8.70554	3.80336	Caribia	VB
G77	8.87942	4.31764	Caribia	VB
G6	9.06367	4.31764	Caribia	VB
G68	9.22483	4.31764	Caribia	VB
G26	9.23999	4.31764	Caribia	VB
G67	9.26598	3.80336	Caribia	VB
G74	9.32506	3.43771	Caribia	VB
G86	9.37717	3.80336	Caribia	VB
G27	9.55297	3.80336	Caribia	VB
G70	9.87363	4.31764	Caribia	VB
G48	10.2374	3.43771	Caribia	VB
G23	10.3054	4.31764	Caribia	VB
G73	10.438	3.80336	Caribia	VB
G55	10.5146	4.31764	Caribia	VB
G9	10.5723	4.31764	Caribia	VB
G43	10.8495	4.31764	Caribia	VB
G38	11.2697	4.31764	Caribia	VB
G45	11.3243	3.80336	Caribia	VB
G72	11.4574	4.31764	Caribia	VB
G42	11.4949	4.31764	Caribia	VB
G18	11.8933	4.31764	Caribia	VB
G24	12.2695	4.31764	Caribia	VB
G10	12.4332	3.80336	Caribia	VB
G5	12.5025	4.31764	Caribia	VB
G39	12.517	4.31764	Caribia	VB
G84	12.5216	4.31764	Caribia	VB
G11	12.5485	4.31764	Caribia	VB
G2	12.7708	4.31764	Caribia	VB
G82	12.9098	4.31764	Caribia	VB
G31	13.3745	3.43771	Caribia	VB
G28	13.8524	3.43771	Caribia	VB
G85	15.8417	3.80336	Caribia	VB
G13	17.7661	3.80336	Caribia	VB
G87	18.4904	3.80336	Caribia	VB
G49	19.0588	3.43771	Caribia	VB
G22	20.9705	3.80336	Caribia	VB
G69	2.56579	2.51127	Caribia	YLP
G37	2.70887	2.51127	Caribia	YLP
G74	2.72115	2.13362	Caribia	YLP
G24	2.96512	2.51127	Caribia	YLP
G70	2.99859	2.51127	Caribia	YLP
G76	3.00908	2.51127	Caribia	YLP
G68	3.07876	2.51127	Caribia	YLP
G9	3.09261	1.88723	Caribia	YLP
G48	3.14181	1.88723	Caribia	YLP
G27	3.16289	2.13362	Caribia	YLP
G73	3.27573	2.13362	Caribia	YLP
G50	3.29722	2.51127	Caribia	YLP
G43	3.30878	1.88723	Caribia	YLP
G67	3.33223	2.51127	Caribia	YLP
G6	3.33391	2.13362	Caribia	YLP
G39	3.33673	2.51127	Caribia	YLP
G77	3.35919	2.51127	Caribia	YLP
G45	3.36474	2.51127	Caribia	YLP
G26	3.47562	2.51127	Caribia	YLP
G31	3.77151	2.13362	Caribia	YLP
G55	3.77311	2.51127	Caribia	YLP
G11	3.82598	2.51127	Caribia	YLP
G82	3.83798	2.51127	Caribia	YLP
G72	3.92757	2.51127	Caribia	YLP
G49	3.9317	2.51127	Caribia	YLP
G23	4.19345	2.51127	Caribia	YLP
G13	4.24791	2.13362	Caribia	YLP
G38	4.29749	2.13362	Caribia	YLP
G18	4.32574	2.51127	Caribia	YLP
G42	4.43428	2.51127	Caribia	YLP
G28	5.33009	2.51127	Caribia	YLP
G10	5.51128	2.51127	Caribia	YLP
G86	5.5711	2.51127	Caribia	YLP
G22	6.04086	1.88723	Caribia	YLP
G84	6.08756	1.88723	Caribia	YLP
G65	6.16031	2.13362	Caribia	YLP
G5	6.42066	2.13362	Caribia	YLP
G85	9.06988	2.13362	Caribia	YLP
G2	10.2544	1.88723	Caribia	YLP
G87	13.3567	2.13362	Caribia	YLP
G63	2.58447	2.81071	Motilonia	BS
G19	2.60653	2.81071	Motilonia	BS
G78	2.65816	2.81071	Motilonia	BS
G74	2.68712	2.81071	Motilonia	BS
G65	2.81908	2.81071	Motilonia	BS
G70	3.09778	3.23852	Motilonia	BS
G75	3.11218	2.81071	Motilonia	BS
G62	3.23675	2.81071	Motilonia	BS
G76	3.30247	3.23852	Motilonia	BS
G64	3.4078	2.81071	Motilonia	BS
G71	3.47367	3.23852	Motilonia	BS
G56	3.49811	2.81071	Motilonia	BS
G57	3.55016	3.23852	Motilonia	BS
G79	3.74345	2.81071	Motilonia	BS
G43	3.78387	3.23852	Motilonia	BS
G77	3.79855	2.81071	Motilonia	BS
G80	3.89688	3.23852	Motilonia	BS
G38	3.9826	3.23852	Motilonia	BS
G34	3.99792	2.81071	Motilonia	BS
G54	4.0456	3.23852	Motilonia	BS
G14	4.06777	2.81071	Motilonia	BS
G51	4.10756	2.81071	Motilonia	BS
G68	4.12248	2.81071	Motilonia	BS
G12	4.28013	3.23852	Motilonia	BS
G67	4.3494	2.81071	Motilonia	BS
G45	4.35388	3.23852	Motilonia	BS
G37	4.39322	2.81071	Motilonia	BS
G10	4.48698	3.94935	Motilonia	BS
G20	4.54979	2.81071	Motilonia	BS
G55	4.5788	3.23852	Motilonia	BS
G59	4.63601	3.94935	Motilonia	BS
G66	4.74891	2.81071	Motilonia	BS
G60	4.75432	3.23852	Motilonia	BS
G36	4.90047	3.23852	Motilonia	BS
G73	4.97355	3.23852	Motilonia	BS
G29	5.03477	3.94935	Motilonia	BS
G69	5.08892	3.23852	Motilonia	BS
G50	5.1197	3.23852	Motilonia	BS
G41	5.27047	2.81071	Motilonia	BS
G30	5.28476	2.81071	Motilonia	BS
G72	5.3528	3.94935	Motilonia	BS
G86	5.52195	3.23852	Motilonia	BS
G32	5.6064	3.94935	Motilonia	BS
G35	5.79371	3.23852	Motilonia	BS
G40	5.79558	2.81071	Motilonia	BS
G61	5.86414	2.81071	Motilonia	BS
G7	6.05643	3.94935	Motilonia	BS
G26	6.61397	3.94935	Motilonia	BS
G11	6.89596	2.81071	Motilonia	BS
G25	7.14702	3.94935	Motilonia	BS
G21	7.17121	3.94935	Motilonia	BS
G58	7.3363	3.23852	Motilonia	BS
G22	7.45979	2.81071	Motilonia	BS
G47	7.47897	2.81071	Motilonia	BS
G83	7.49938	3.23852	Motilonia	BS
G15	7.76311	3.94935	Motilonia	BS
G28	7.96903	3.23852	Motilonia	BS
G39	7.9988	2.81071	Motilonia	BS
G2	8.11855	2.81071	Motilonia	BS
G24	8.12041	2.81071	Motilonia	BS
G44	8.54375	2.81071	Motilonia	BS
G8	8.67432	2.81071	Motilonia	BS
G42	8.82262	2.81071	Motilonia	BS
G13	9.37345	3.94935	Motilonia	BS
G23	9.90396	2.81071	Motilonia	BS
G9	10.0986	2.81071	Motilonia	BS
G6	10.6121	3.23852	Motilonia	BS
G85	10.9463	3.23852	Motilonia	BS
G27	11.7238	2.81071	Motilonia	BS
G1	11.8364	2.81071	Motilonia	BS
G84	11.9144	2.81071	Motilonia	BS
G18	13.1125	3.94935	Motilonia	BS
G3	14.1519	3.94935	Motilonia	BS
G16	14.38	3.23852	Motilonia	BS
G17	14.4368	2.81071	Motilonia	BS
G5	14.5758	3.23852	Motilonia	BS
G48	17.1707	2.81071	Motilonia	BS
G81	20.4793	2.81071	Motilonia	BS
G82	21.4088	2.81071	Motilonia	BS
G87	25.2266	3.23852	Motilonia	BS
G19	2.76691	2.93058	Motilonia	NP
G63	2.78391	2.93058	Motilonia	NP
G78	2.85835	2.93058	Motilonia	NP
G74	2.89094	2.93058	Motilonia	NP
G70	3.23508	2.93058	Motilonia	NP
G65	3.24758	3.3304	Motilonia	NP
G75	3.32391	2.93058	Motilonia	NP
G64	3.5872	2.93058	Motilonia	NP
G62	3.62351	3.3304	Motilonia	NP
G56	3.62943	2.93058	Motilonia	NP
G71	3.63792	3.3304	Motilonia	NP
G76	3.6683	2.93058	Motilonia	NP
G57	3.71356	3.3304	Motilonia	NP
G79	3.80798	2.93058	Motilonia	NP
G43	3.86192	3.3304	Motilonia	NP
G38	4.06196	2.93058	Motilonia	NP
G77	4.10712	3.3304	Motilonia	NP
G14	4.1359	3.3304	Motilonia	NP
G54	4.18989	2.93058	Motilonia	NP
G34	4.20067	3.3304	Motilonia	NP
G68	4.25287	2.93058	Motilonia	NP
G51	4.39486	2.93058	Motilonia	NP
G12	4.41839	2.93058	Motilonia	NP
G10	4.46837	3.3304	Motilonia	NP
G67	4.51016	2.93058	Motilonia	NP
G80	4.5263	3.3304	Motilonia	NP
G37	4.55307	2.93058	Motilonia	NP
G45	4.59301	3.95658	Motilonia	NP
G55	4.62209	2.93058	Motilonia	NP
G20	4.77382	3.3304	Motilonia	NP
G29	5.07777	3.95658	Motilonia	NP
G69	5.10951	2.93058	Motilonia	NP
G59	5.11355	3.3304	Motilonia	NP
G66	5.20313	3.3304	Motilonia	NP
G60	5.20742	3.3304	Motilonia	NP
G36	5.32339	3.95658	Motilonia	NP
G72	5.37552	3.3304	Motilonia	NP
G73	5.38137	3.3304	Motilonia	NP
G30	5.42196	2.93058	Motilonia	NP
G41	5.46865	2.93058	Motilonia	NP
G50	5.49733	3.95658	Motilonia	NP
G32	5.54377	3.3304	Motilonia	NP
G86	5.54522	3.95658	Motilonia	NP
G35	5.70895	3.3304	Motilonia	NP
G40	5.73853	2.93058	Motilonia	NP
G61	5.92046	2.93058	Motilonia	NP
G7	5.9664	3.95658	Motilonia	NP
G26	6.62608	3.95658	Motilonia	NP
G21	6.88473	2.93058	Motilonia	NP
G11	6.93078	3.95658	Motilonia	NP
G25	6.95983	3.95658	Motilonia	NP
G58	7.25609	3.3304	Motilonia	NP
G47	7.30543	2.93058	Motilonia	NP
G22	7.3847	2.93058	Motilonia	NP
G83	7.3886	3.3304	Motilonia	NP
G28	7.62271	3.95658	Motilonia	NP
G2	7.63724	3.3304	Motilonia	NP
G15	7.7212	2.93058	Motilonia	NP
G39	7.78985	2.93058	Motilonia	NP
G24	8.0402	2.93058	Motilonia	NP
G44	8.28058	2.93058	Motilonia	NP
G42	8.47184	2.93058	Motilonia	NP
G8	8.60757	2.93058	Motilonia	NP
G13	9.1042	3.95658	Motilonia	NP
G9	9.50664	2.93058	Motilonia	NP
G23	9.77802	2.93058	Motilonia	NP
G6	10.4065	3.3304	Motilonia	NP
G85	10.6853	3.3304	Motilonia	NP
G27	11.1905	2.93058	Motilonia	NP
G1	11.4401	2.93058	Motilonia	NP
G84	11.5203	2.93058	Motilonia	NP
G18	12.7579	3.3304	Motilonia	NP
G3	13.7339	3.3304	Motilonia	NP
G17	13.739	3.3304	Motilonia	NP
G16	13.8501	2.93058	Motilonia	NP
G5	14.1251	3.3304	Motilonia	NP
G81	14.5913	2.93058	Motilonia	NP
G48	16.774	2.93058	Motilonia	NP
G82	19.9348	2.93058	Motilonia	NP
G87	23.6375	3.3304	Motilonia	NP
G63	0.7528	0.293425	Motilonia	NS
G51	0.937323	0.293425	Motilonia	NS
G34	0.967886	0.293425	Motilonia	NS
G59	1.03528	0.293425	Motilonia	NS
G40	1.13007	0.293425	Motilonia	NS
G36	1.15218	0.343305	Motilonia	NS
G58	1.15218	0.293425	Motilonia	NS
G60	1.15218	0.293425	Motilonia	NS
G84	1.18922	0.343305	Motilonia	NS
G54	1.28213	0.293425	Motilonia	NS
G71	1.29176	0.343305	Motilonia	NS
G76	1.30621	0.293425	Motilonia	NS
G55	1.31444	0.343305	Motilonia	NS
G7	1.39955	0.293425	Motilonia	NS
G68	1.45345	0.343305	Motilonia	NS
G41	1.45377	0.293425	Motilonia	NS
G39	1.4675	0.343305	Motilonia	NS
G32	1.50734	0.343305	Motilonia	NS
G1	1.50734	0.293425	Motilonia	NS
G74	1.50734	0.343305	Motilonia	NS
G47	1.53578	0.293425	Motilonia	NS
G12	1.56124	0.293425	Motilonia	NS
G2	1.56124	0.293425	Motilonia	NS
G21	1.56124	0.343305	Motilonia	NS
G64	1.56124	0.293425	Motilonia	NS
G61	1.5844	0.343305	Motilonia	NS
G65	1.60132	0.293425	Motilonia	NS
G77	1.60132	0.432143	Motilonia	NS
G72	1.61513	0.293425	Motilonia	NS
G11	1.61513	0.343305	Motilonia	NS
G57	1.66903	0.432143	Motilonia	NS
G75	1.66903	0.293425	Motilonia	NS
G20	1.6751	0.343305	Motilonia	NS
G43	1.68333	0.343305	Motilonia	NS
G30	1.70566	0.343305	Motilonia	NS
G50	1.73668	0.432143	Motilonia	NS
G24	1.74888	0.343305	Motilonia	NS
G9	1.74888	0.343305	Motilonia	NS
G14	1.75711	0.293425	Motilonia	NS
G80	1.75711	0.293425	Motilonia	NS
G29	1.77682	0.432143	Motilonia	NS
G56	1.77682	0.343305	Motilonia	NS
G6	1.77682	0.432143	Motilonia	NS
G81	1.77944	0.343305	Motilonia	NS
G48	1.83072	0.293425	Motilonia	NS
G19	1.83089	0.293425	Motilonia	NS
G28	1.88461	0.432143	Motilonia	NS
G78	1.88461	0.432143	Motilonia	NS
G25	1.90466	0.293425	Motilonia	NS
G37	1.93851	0.432143	Motilonia	NS
G79	1.93851	0.432143	Motilonia	NS
G73	1.97048	0.343305	Motilonia	NS
G16	1.99241	0.293425	Motilonia	NS
G5	2.0463	0.293425	Motilonia	NS
G35	2.15409	0.343305	Motilonia	NS
G70	2.15409	0.432143	Motilonia	NS
G18	2.15409	0.343305	Motilonia	NS
G27	2.19154	0.293425	Motilonia	NS
G62	2.19154	0.293425	Motilonia	NS
G38	2.19977	0.293425	Motilonia	NS
G23	2.20799	0.293425	Motilonia	NS
G26	2.20799	0.293425	Motilonia	NS
G15	2.26189	0.293425	Motilonia	NS
G66	2.32119	0.432143	Motilonia	NS
G82	2.41287	0.293425	Motilonia	NS
G69	2.53137	0.293425	Motilonia	NS
G3	2.58526	0.343305	Motilonia	NS
G86	2.58526	0.343305	Motilonia	NS
G45	2.59099	0.293425	Motilonia	NS
G22	2.6342	0.293425	Motilonia	NS
G13	2.63916	0.293425	Motilonia	NS
G10	2.69305	0.343305	Motilonia	NS
G42	2.73855	0.343305	Motilonia	NS
G83	2.74695	0.343305	Motilonia	NS
G17	2.78999	0.293425	Motilonia	NS
G67	2.81232	0.343305	Motilonia	NS
G85	2.85474	0.293425	Motilonia	NS
G44	2.91874	0.293425	Motilonia	NS
G8	2.96253	0.293425	Motilonia	NS
G87	4.13028	0.343305	Motilonia	NS
G63	0.785435	0.783461	Motilonia	VB
G65	0.808162	0.783461	Motilonia	VB
G74	0.813749	0.783461	Motilonia	VB
G19	0.848249	0.783461	Motilonia	VB
G62	0.922806	0.783461	Motilonia	VB
G70	0.92702	0.900513	Motilonia	VB
G75	0.93099	0.783461	Motilonia	VB
G76	0.940846	0.783461	Motilonia	VB
G78	0.941685	0.900513	Motilonia	VB
G80	0.948731	0.783461	Motilonia	VB
G64	1.01253	0.900513	Motilonia	VB
G71	1.0307	0.783461	Motilonia	VB
G56	1.03744	0.900513	Motilonia	VB
G57	1.0518	0.783461	Motilonia	VB
G77	1.07701	0.900513	Motilonia	VB
G79	1.10579	0.783461	Motilonia	VB
G34	1.15633	0.900513	Motilonia	VB
G51	1.16183	0.900513	Motilonia	VB
G43	1.17141	0.783461	Motilonia	VB
G68	1.20966	0.900513	Motilonia	VB
G38	1.22596	0.783461	Motilonia	VB
G54	1.24113	0.783461	Motilonia	VB
G14	1.24934	0.783461	Motilonia	VB
G81	1.24934	0.900513	Motilonia	VB
G67	1.25281	0.783461	Motilonia	VB
G12	1.25314	0.900513	Motilonia	VB
G45	1.25404	0.783461	Motilonia	VB
G59	1.25667	1.09294	Motilonia	VB
G20	1.28322	0.783461	Motilonia	VB
G37	1.28434	0.900513	Motilonia	VB
G66	1.28736	1.09294	Motilonia	VB
G60	1.28883	0.783461	Motilonia	VB
G10	1.3102	0.900513	Motilonia	VB
G36	1.32857	0.900513	Motilonia	VB
G73	1.34844	0.900513	Motilonia	VB
G50	1.38817	1.09294	Motilonia	VB
G55	1.38961	0.900513	Motilonia	VB
G29	1.46129	0.900513	Motilonia	VB
G69	1.47623	0.783461	Motilonia	VB
G41	1.48104	0.783461	Motilonia	VB
G30	1.50955	1.09294	Motilonia	VB
G72	1.54901	0.900513	Motilonia	VB
G32	1.61896	1.09294	Motilonia	VB
G35	1.67063	0.900513	Motilonia	VB
G40	1.67114	0.783461	Motilonia	VB
G61	1.69933	0.783461	Motilonia	VB
G7	1.74309	1.09294	Motilonia	VB
G26	1.89688	1.09294	Motilonia	VB
G11	1.97466	0.783461	Motilonia	VB
G58	1.99082	1.09294	Motilonia	VB
G21	2.05058	1.09294	Motilonia	VB
G86	2.06903	0.900513	Motilonia	VB
G22	2.08197	0.783461	Motilonia	VB
G84	2.08631	0.783461	Motilonia	VB
G25	2.09455	0.900513	Motilonia	VB
G47	2.18567	1.09294	Motilonia	VB
G15	2.21384	0.900513	Motilonia	VB
G24	2.26331	0.783461	Motilonia	VB
G28	2.27064	0.783461	Motilonia	VB
G39	2.2797	0.783461	Motilonia	VB
G83	2.30126	0.783461	Motilonia	VB
G2	2.31188	0.783461	Motilonia	VB
G44	2.46409	0.783461	Motilonia	VB
G8	2.46518	1.09294	Motilonia	VB
G42	2.48064	0.783461	Motilonia	VB
G13	2.65802	0.783461	Motilonia	VB
G23	2.80434	0.900513	Motilonia	VB
G9	2.8063	0.900513	Motilonia	VB
G6	2.99968	0.783461	Motilonia	VB
G27	3.25238	0.783461	Motilonia	VB
G1	3.33737	0.783461	Motilonia	VB
G85	3.52064	0.900513	Motilonia	VB
G18	3.68935	0.900513	Motilonia	VB
G3	3.97605	0.783461	Motilonia	VB
G16	4.03895	0.900513	Motilonia	VB
G5	4.09295	0.900513	Motilonia	VB
G17	4.09549	0.783461	Motilonia	VB
G48	4.80871	0.783461	Motilonia	VB
G82	6.87538	0.783461	Motilonia	VB
G87	7.17643	0.900513	Motilonia	VB
G63	2.79493	2.83328	Motilonia	YLP
G19	2.85065	2.83328	Motilonia	YLP
G78	2.86358	2.83328	Motilonia	YLP
G74	2.89056	2.83328	Motilonia	YLP
G65	3.13934	2.83328	Motilonia	YLP
G70	3.27312	3.22854	Motilonia	YLP
G75	3.28653	2.83328	Motilonia	YLP
G62	3.5199	2.83328	Motilonia	YLP
G64	3.56192	3.22854	Motilonia	YLP
G76	3.57978	2.83328	Motilonia	YLP
G71	3.62328	3.22854	Motilonia	YLP
G56	3.64605	2.83328	Motilonia	YLP
G57	3.69454	3.22854	Motilonia	YLP
G79	3.8746	2.83328	Motilonia	YLP
G43	3.92337	3.22854	Motilonia	YLP
G77	4.03177	2.83328	Motilonia	YLP
G38	4.10444	3.22854	Motilonia	YLP
G34	4.17281	3.22854	Motilonia	YLP
G14	4.18205	2.83328	Motilonia	YLP
G68	4.22769	3.22854	Motilonia	YLP
G54	4.25008	2.83328	Motilonia	YLP
G51	4.31333	2.83328	Motilonia	YLP
G12	4.37455	2.83328	Motilonia	YLP
G37	4.47991	3.22854	Motilonia	YLP
G67	4.49306	2.83328	Motilonia	YLP
G45	4.49715	3.22854	Motilonia	YLP
G80	4.53424	2.83328	Motilonia	YLP
G10	4.56725	3.85463	Motilonia	YLP
G55	4.64766	2.83328	Motilonia	YLP
G20	4.71627	3.22854	Motilonia	YLP
G59	4.90118	3.85463	Motilonia	YLP
G66	4.99978	2.83328	Motilonia	YLP
G60	5.0045	3.22854	Motilonia	YLP
G29	5.07755	3.22854	Motilonia	YLP
G69	5.128	3.22854	Motilonia	YLP
G36	5.13214	3.85463	Motilonia	YLP
G73	5.19596	3.22854	Motilonia	YLP
G50	5.3236	3.22854	Motilonia	YLP
G30	5.34531	2.83328	Motilonia	YLP
G41	5.37291	2.83328	Motilonia	YLP
G72	5.37382	3.85463	Motilonia	YLP
G86	5.5314	3.22854	Motilonia	YLP
G32	5.61007	3.85463	Motilonia	YLP
G35	5.78456	3.22854	Motilonia	YLP
G40	5.7863	2.83328	Motilonia	YLP
G61	5.89618	2.83328	Motilonia	YLP
G7	6.0293	3.85463	Motilonia	YLP
G26	6.54868	3.85463	Motilonia	YLP
G11	6.81138	2.83328	Motilonia	YLP
G25	6.98768	3.85463	Motilonia	YLP
G21	7.06779	3.85463	Motilonia	YLP
G58	7.25944	3.22854	Motilonia	YLP
G47	7.29013	2.83328	Motilonia	YLP
G22	7.3677	2.83328	Motilonia	YLP
G83	7.37351	3.22854	Motilonia	YLP
G15	7.61919	3.85463	Motilonia	YLP
G39	7.76047	3.22854	Motilonia	YLP
G28	7.81102	2.83328	Motilonia	YLP
G2	7.9503	2.83328	Motilonia	YLP
G24	7.96961	2.83328	Motilonia	YLP
G44	8.17849	2.83328	Motilonia	YLP
G8	8.46805	2.83328	Motilonia	YLP
G42	8.5688	2.83328	Motilonia	YLP
G13	9.11933	3.85463	Motilonia	YLP
G23	9.61353	2.83328	Motilonia	YLP
G9	9.77205	2.83328	Motilonia	YLP
G6	10.2732	3.22854	Motilonia	YLP
G85	10.5846	3.22854	Motilonia	YLP
G27	11.2528	2.83328	Motilonia	YLP
G84	11.3859	2.83328	Motilonia	YLP
G1	11.4138	2.83328	Motilonia	YLP
G18	12.6025	3.22854	Motilonia	YLP
G3	13.5708	3.22854	Motilonia	YLP
G17	13.6297	3.22854	Motilonia	YLP
G16	13.7833	2.83328	Motilonia	YLP
G5	13.9656	3.22854	Motilonia	YLP
G81	14.0383	2.83328	Motilonia	YLP
G48	16.383	2.83328	Motilonia	YLP
G82	20.0772	2.83328	Motilonia	YLP
G87	23.8876	3.22854	Motilonia	YLP
G36	3.67605	7.24764	Turipana	NP
G40	3.67605	7.24764	Turipana	NP
G44	3.67605	7.24764	Turipana	NP
G57	3.67605	7.24764	Turipana	NP
G49	3.87872	7.24764	Turipana	NP
G45	4.0814	7.24764	Turipana	NP
G33	4.28407	7.24764	Turipana	NP
G52	4.28407	7.24764	Turipana	NP
G53	4.28407	7.24764	Turipana	NP
G54	4.28407	7.24764	Turipana	NP
G60	4.28407	7.24764	Turipana	NP
G16	4.68941	7.24764	Turipana	NP
G18	4.68941	7.24764	Turipana	NP
G11	4.89209	7.24764	Turipana	NP
G41	4.89209	7.24764	Turipana	NP
G81	5.09476	7.24764	Turipana	NP
G42	5.5001	7.24764	Turipana	NP
G65	5.5001	7.24764	Turipana	NP
G20	5.70278	7.24764	Turipana	NP
G47	5.70278	7.24764	Turipana	NP
G48	5.70278	7.24764	Turipana	NP
G51	5.70278	7.24764	Turipana	NP
G59	5.70278	7.24764	Turipana	NP
G25	5.90545	7.24764	Turipana	NP
G63	5.90545	7.24764	Turipana	NP
G12	5.90545	7.24764	Turipana	NP
G31	5.90545	7.24764	Turipana	NP
G78	6.10812	7.24764	Turipana	NP
G80	6.10812	7.24764	Turipana	NP
G38	6.31079	7.24764	Turipana	NP
G50	6.31079	7.24764	Turipana	NP
G2	6.51347	7.24764	Turipana	NP
G21	6.51347	7.24764	Turipana	NP
G22	6.51347	7.24764	Turipana	NP
G64	6.51347	7.24764	Turipana	NP
G56	6.91881	7.24764	Turipana	NP
G71	6.91881	7.24764	Turipana	NP
G76	7.12148	7.24764	Turipana	NP
G24	7.32416	7.24764	Turipana	NP
G43	7.32416	7.24764	Turipana	NP
G61	7.32416	7.24764	Turipana	NP
G15	7.7295	7.24764	Turipana	NP
G39	7.7295	7.24764	Turipana	NP
G58	7.7295	7.24764	Turipana	NP
G23	8.33752	7.24764	Turipana	NP
G30	8.33752	7.24764	Turipana	NP
G77	8.74286	7.24764	Turipana	NP
G46	9.14821	7.24764	Turipana	NP
G3	9.55355	7.24764	Turipana	NP
G9	9.55355	7.24764	Turipana	NP
G66	9.75623	7.24764	Turipana	NP
G67	9.75623	7.24764	Turipana	NP
G55	9.9589	7.24764	Turipana	NP
G7	9.9589	7.24764	Turipana	NP
G29	10.1616	7.24764	Turipana	NP
G84	10.1616	7.24764	Turipana	NP
G28	10.1616	7.24764	Turipana	NP
G14	10.3642	7.24764	Turipana	NP
G4	10.3642	7.24764	Turipana	NP
G35	11.1749	7.24764	Turipana	NP
G70	11.1749	7.24764	Turipana	NP
G73	11.1749	7.24764	Turipana	NP
G32	11.3776	7.24764	Turipana	NP
G69	11.5803	7.24764	Turipana	NP
G1	11.9856	7.24764	Turipana	NP
G79	12.1883	7.24764	Turipana	NP
G62	12.391	7.24764	Turipana	NP
G68	12.7963	7.24764	Turipana	NP
G19	13.607	7.24764	Turipana	NP
G5	13.607	7.24764	Turipana	NP
G72	13.8097	7.24764	Turipana	NP
G74	13.8097	7.24764	Turipana	NP
G85	14.0123	7.24764	Turipana	NP
G37	14.823	7.24764	Turipana	NP
G10	17.4578	7.24764	Turipana	NP
G26	17.4578	7.24764	Turipana	NP
G82	18.6738	7.24764	Turipana	NP
G83	19.2818	7.24764	Turipana	NP
G27	19.8899	7.24764	Turipana	NP
G75	20.0925	7.24764	Turipana	NP
G8	21.7139	7.24764	Turipana	NP
G34	22.9299	7.24764	Turipana	NP
G86	23.3353	7.24764	Turipana	NP
G17	23.9433	7.24764	Turipana	NP
G6	26.9834	7.24764	Turipana	NP
G13	44.2106	7.24764	Turipana	NP
G87	68.3407	7.24764	Turipana	NP
G36	0.885417	0.559163	Turipana	NS
G40	0.885417	0.559163	Turipana	NS
G44	0.885417	0.559163	Turipana	NS
G57	0.885417	0.559163	Turipana	NS
G45	1.02899	0.559163	Turipana	NS
G53	1.02899	0.559163	Turipana	NS
G59	1.05771	0.559163	Turipana	NS
G41	1.08643	0.559163	Turipana	NS
G33	1.10078	0.559163	Turipana	NS
G48	1.11514	0.559163	Turipana	NS
G21	1.14386	0.559163	Turipana	NS
G43	1.17257	0.559163	Turipana	NS
G49	1.17257	0.559163	Turipana	NS
G50	1.17257	0.559163	Turipana	NS
G60	1.17257	0.559163	Turipana	NS
G78	1.20129	0.559163	Turipana	NS
G56	1.20129	0.559163	Turipana	NS
G77	1.20129	0.559163	Turipana	NS
G81	1.20129	0.559163	Turipana	NS
G2	1.23	0.559163	Turipana	NS
G38	1.23	0.559163	Turipana	NS
G42	1.24915	0.559163	Turipana	NS
G31	1.25872	0.559163	Turipana	NS
G32	1.31615	0.559163	Turipana	NS
G76	1.31615	0.559163	Turipana	NS
G16	1.35205	0.559163	Turipana	NS
G64	1.35205	0.559163	Turipana	NS
G12	1.37358	0.559163	Turipana	NS
G25	1.37358	0.559163	Turipana	NS
G52	1.38794	0.559163	Turipana	NS
G54	1.38794	0.559163	Turipana	NS
G20	1.39273	0.559163	Turipana	NS
G80	1.39512	0.559163	Turipana	NS
G63	1.4023	0.559163	Turipana	NS
G58	1.40948	0.559163	Turipana	NS
G61	1.42383	0.559163	Turipana	NS
G51	1.43101	0.559163	Turipana	NS
G24	1.45973	0.559163	Turipana	NS
G37	1.45973	0.559163	Turipana	NS
G71	1.45973	0.559163	Turipana	NS
G29	1.48845	0.559163	Turipana	NS
G15	1.5028	0.559163	Turipana	NS
G26	1.51716	0.559163	Turipana	NS
G39	1.51716	0.559163	Turipana	NS
G30	1.57459	0.559163	Turipana	NS
G47	1.60331	0.559163	Turipana	NS
G84	1.62245	0.559163	Turipana	NS
G11	1.63202	0.559163	Turipana	NS
G18	1.63202	0.559163	Turipana	NS
G62	1.63202	0.559163	Turipana	NS
G65	1.63202	0.559163	Turipana	NS
G4	1.66074	0.559163	Turipana	NS
G66	1.70381	0.559163	Turipana	NS
G68	1.71817	0.559163	Turipana	NS
G79	1.74689	0.559163	Turipana	NS
G35	1.7756	0.559163	Turipana	NS
G22	1.79714	0.559163	Turipana	NS
G10	1.86175	0.559163	Turipana	NS
G14	1.86175	0.559163	Turipana	NS
G70	1.86175	0.559163	Turipana	NS
G73	1.87132	0.559163	Turipana	NS
G46	1.90004	0.559163	Turipana	NS
G55	1.91918	0.559163	Turipana	NS
G69	1.97661	0.559163	Turipana	NS
G67	1.99097	0.559163	Turipana	NS
G9	1.99097	0.559163	Turipana	NS
G5	2.00533	0.559163	Turipana	NS
G8	2.00533	0.559163	Turipana	NS
G74	2.06276	0.559163	Turipana	NS
G83	2.06276	0.559163	Turipana	NS
G86	2.0819	0.559163	Turipana	NS
G17	2.09147	0.559163	Turipana	NS
G72	2.12019	0.559163	Turipana	NS
G3	2.12019	0.559163	Turipana	NS
G1	2.12498	0.559163	Turipana	NS
G75	2.13455	0.559163	Turipana	NS
G85	2.17762	0.559163	Turipana	NS
G34	2.20634	0.559163	Turipana	NS
G19	2.22548	0.559163	Turipana	NS
G7	2.26377	0.559163	Turipana	NS
G27	2.29248	0.559163	Turipana	NS
G23	2.3212	0.559163	Turipana	NS
G28	2.3212	0.559163	Turipana	NS
G6	2.37863	0.559163	Turipana	NS
G13	2.75193	0.559163	Turipana	NS
G82	3.06781	0.559163	Turipana	NS
G87	3.42675	0.559163	Turipana	NS
G36	1.22508	2.99562	Turipana	YLP
G40	1.22508	2.99562	Turipana	YLP
G44	1.22508	2.99562	Turipana	YLP
G57	1.22508	2.99562	Turipana	YLP
G33	1.23609	2.99562	Turipana	YLP
G49	1.23609	2.99562	Turipana	YLP
G59	1.23609	2.99562	Turipana	YLP
G60	1.28232	2.99562	Turipana	YLP
G45	1.33515	2.99562	Turipana	YLP
G53	1.33515	2.99562	Turipana	YLP
G54	1.40779	2.99562	Turipana	YLP
G21	1.44522	2.99562	Turipana	YLP
G52	1.45622	2.99562	Turipana	YLP
G78	1.48264	2.99562	Turipana	YLP
G41	1.62133	2.99562	Turipana	YLP
G48	1.66535	2.99562	Turipana	YLP
G81	1.66535	2.99562	Turipana	YLP
G12	1.67636	2.99562	Turipana	YLP
G16	1.67636	2.99562	Turipana	YLP
G42	1.67636	2.99562	Turipana	YLP
G22	1.68737	2.99562	Turipana	YLP
G20	1.85907	2.99562	Turipana	YLP
G2	1.88549	2.99562	Turipana	YLP
G25	1.88549	2.99562	Turipana	YLP
G37	1.88549	2.99562	Turipana	YLP
G43	1.88549	2.99562	Turipana	YLP
G80	1.88549	2.99562	Turipana	YLP
G65	1.8965	2.99562	Turipana	YLP
G63	1.99556	2.99562	Turipana	YLP
G38	2.10562	2.99562	Turipana	YLP
G64	2.10562	2.99562	Turipana	YLP
G76	2.29934	2.99562	Turipana	YLP
G18	2.32576	2.99562	Turipana	YLP
G31	2.32576	2.99562	Turipana	YLP
G11	2.33677	2.99562	Turipana	YLP
G47	2.33677	2.99562	Turipana	YLP
G71	2.45784	2.99562	Turipana	YLP
G51	2.5569	2.99562	Turipana	YLP
G58	2.56791	2.99562	Turipana	YLP
G24	2.76603	2.99562	Turipana	YLP
G61	2.76603	2.99562	Turipana	YLP
G70	2.76603	2.99562	Turipana	YLP
G77	2.76603	2.99562	Turipana	YLP
G15	2.77704	2.99562	Turipana	YLP
G4	2.78804	2.99562	Turipana	YLP
G50	2.98617	2.99562	Turipana	YLP
G39	2.99717	2.99562	Turipana	YLP
G66	3.00818	2.99562	Turipana	YLP
G67	3.17328	2.99562	Turipana	YLP
G30	3.28115	2.99562	Turipana	YLP
G56	3.28775	2.99562	Turipana	YLP
G23	3.31637	2.99562	Turipana	YLP
G5	3.42644	2.99562	Turipana	YLP
G62	3.65758	2.99562	Turipana	YLP
G9	3.79186	2.99562	Turipana	YLP
G14	3.86671	2.99562	Turipana	YLP
G35	3.86671	2.99562	Turipana	YLP
G69	3.86671	2.99562	Turipana	YLP
G1	3.98778	2.99562	Turipana	YLP
G28	4.0164	2.99562	Turipana	YLP
G73	4.08684	2.99562	Turipana	YLP
G29	4.08684	2.99562	Turipana	YLP
G7	4.09785	2.99562	Turipana	YLP
G3	4.51171	2.99562	Turipana	YLP
G55	4.74725	2.99562	Turipana	YLP
G10	4.87933	2.99562	Turipana	YLP
G79	5.01582	2.99562	Turipana	YLP
G68	5.18752	2.99562	Turipana	YLP
G46	5.20954	2.99562	Turipana	YLP
G74	5.84793	2.99562	Turipana	YLP
G72	6.06807	2.99562	Turipana	YLP
G8	6.65142	2.99562	Turipana	YLP
G84	6.72847	2.99562	Turipana	YLP
G26	7.03666	2.99562	Turipana	YLP
G32	7.82915	2.99562	Turipana	YLP
G6	8.02727	2.99562	Turipana	YLP
G75	8.26942	2.99562	Turipana	YLP
G34	9.61225	2.99562	Turipana	YLP
G27	10.0305	2.99562	Turipana	YLP
G19	10.2506	2.99562	Turipana	YLP
G83	10.823	2.99562	Turipana	YLP
G13	11.162	2.99562	Turipana	YLP
G17	11.5715	2.99562	Turipana	YLP
G86	11.818	2.99562	Turipana	YLP
G82	12.452	2.99562	Turipana	YLP
G85	14.7194	2.99562	Turipana	YLP
G87	30.3217	2.99562	Turipana	YLP
