# Supplementary material for: Multi-Environment Genome-Wide Association Studies of Yield Traits in Common Bean (Phaseolus vulgaris L.) × Tepary Bean (P. acutifolius A. Gray) Interspecific Advanced Lines in Humid and Dry Colombian Caribbean Subregions
Source: MDPI journal article supplement (doi:10.3390/agronomy13051396), 2023-05-18
Supplement: s1 [file s1 › Table S8.xlsx]

## Sheet: Hoja1
Trait	Location	R pearson
YLP	Caribia	0.84
VB	Motilonia	0.82
VB	Caribia	0.81
BS	Motilonia	0.79
NP	Motilonia	0.79
YLP	Motilonia	0.79
YLP	Turipana	0.77
YLP	Carmen	0.7
NP	Turipana	0.69
BS	Caribia	0.68
NP	Caribia	0.67
VB	Carmen	0.66
BS	Carmen	0.66
NS	Turipana	0.59
NS	Carmen	0.52
NS	Caribia	0.5
NP	Carmen	0.4
NS	Motilonia	0.4
