# Supplementary figures and images for: Multi-Environment Genome-Wide Association Studies of Yield Traits in Common Bean (Phaseolus vulgaris L.) × Tepary Bean (P. acutifolius A. Gray) Interspecific Advanced Lines in Humid and Dry Colombian Caribbean Subregions
Source: MDPI journal article supplement (doi:10.3390/agronomy13051396), 2023-05-18

Ancestry smnf

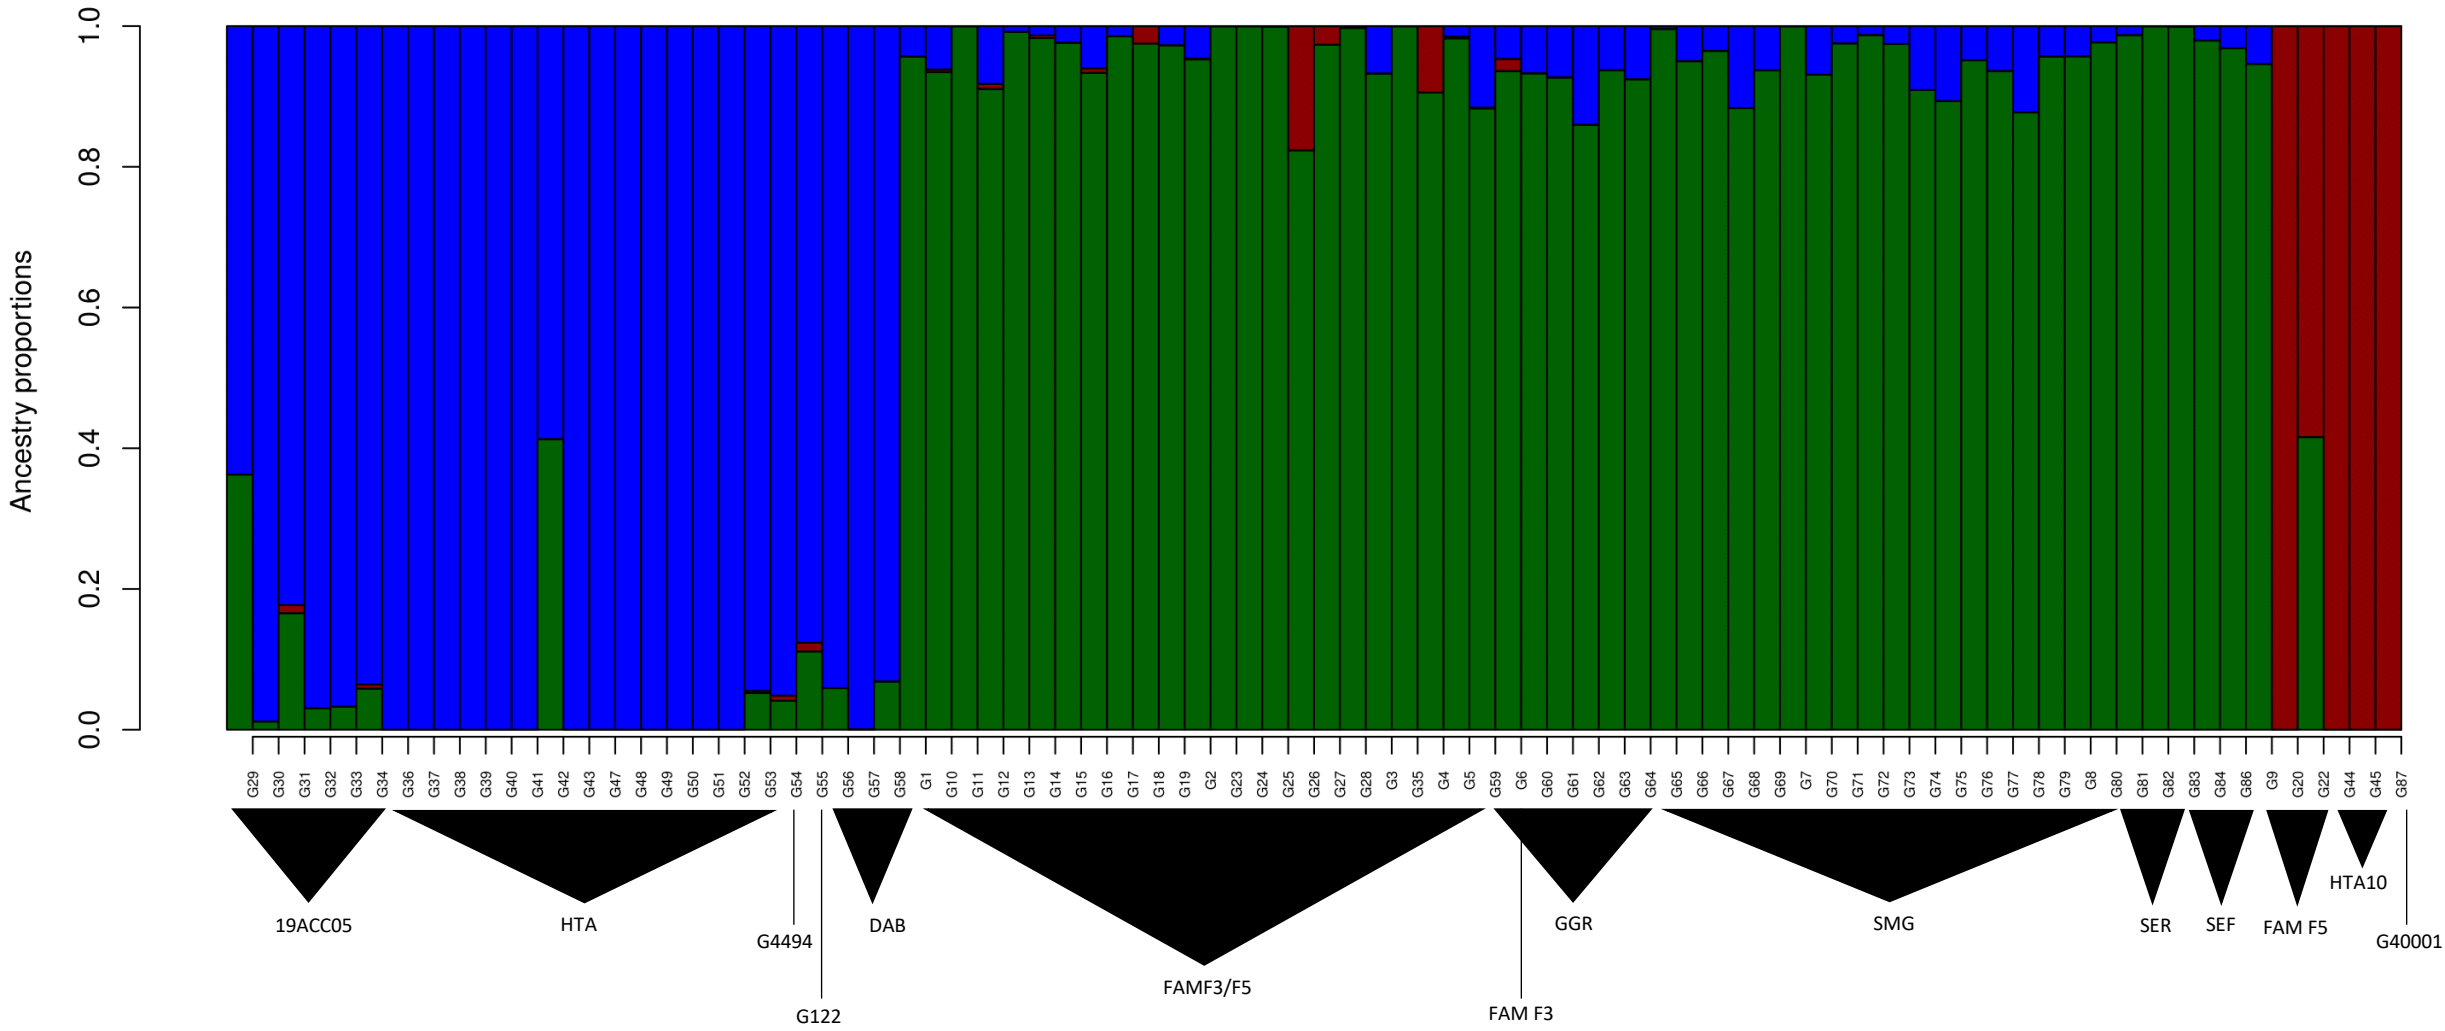

Supplement: s1 [file s1]

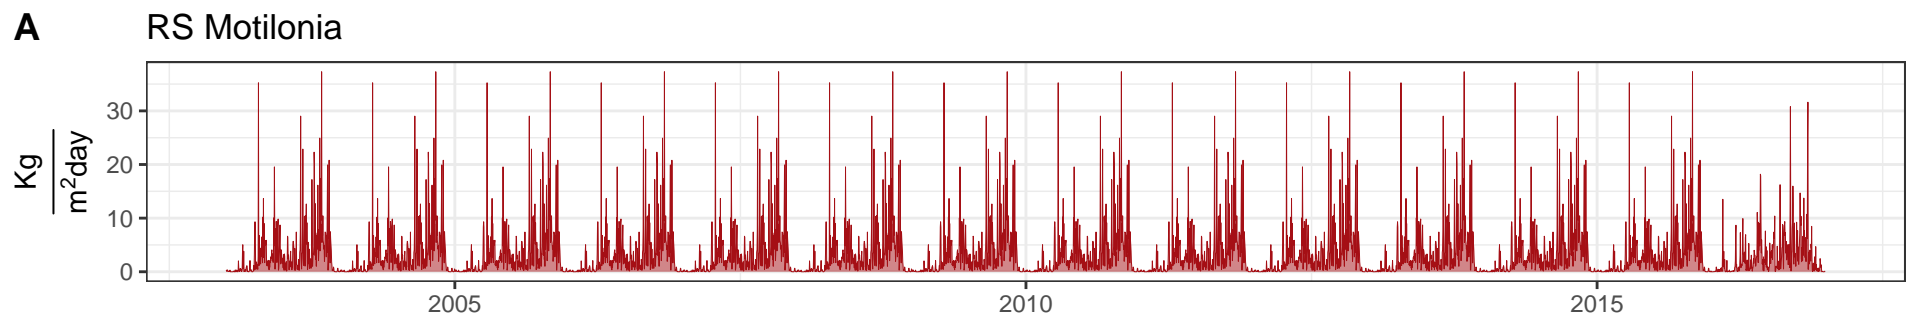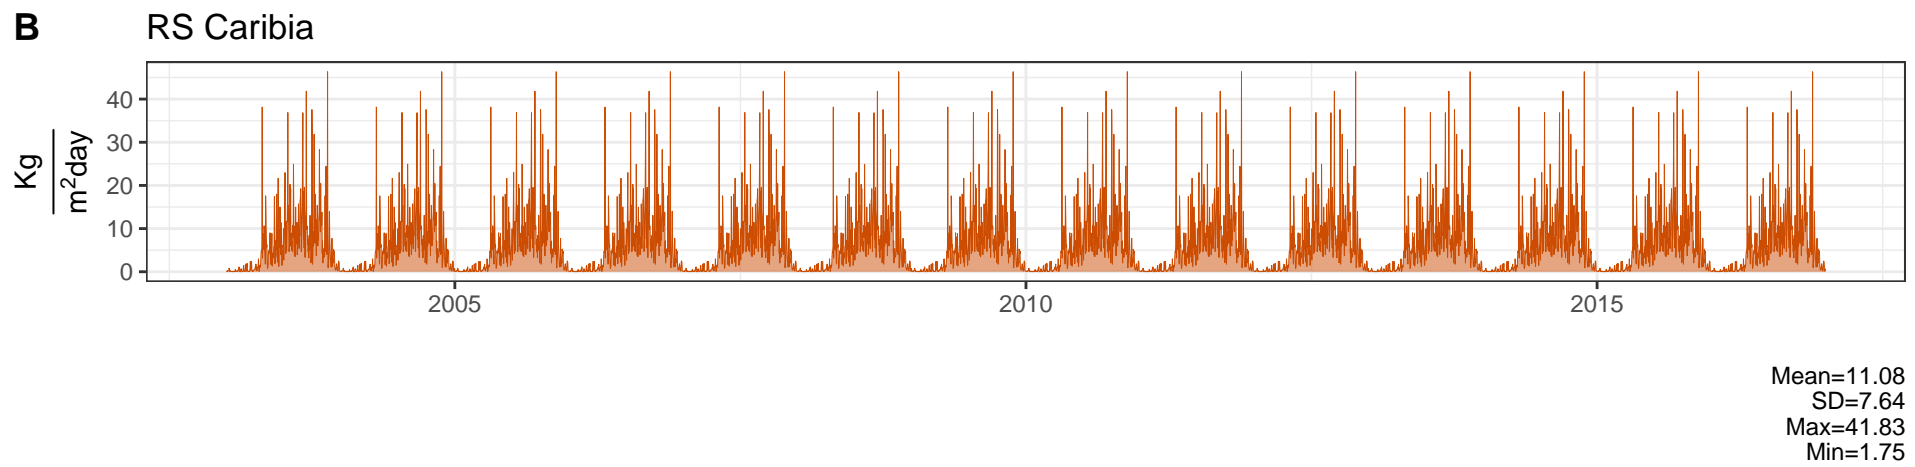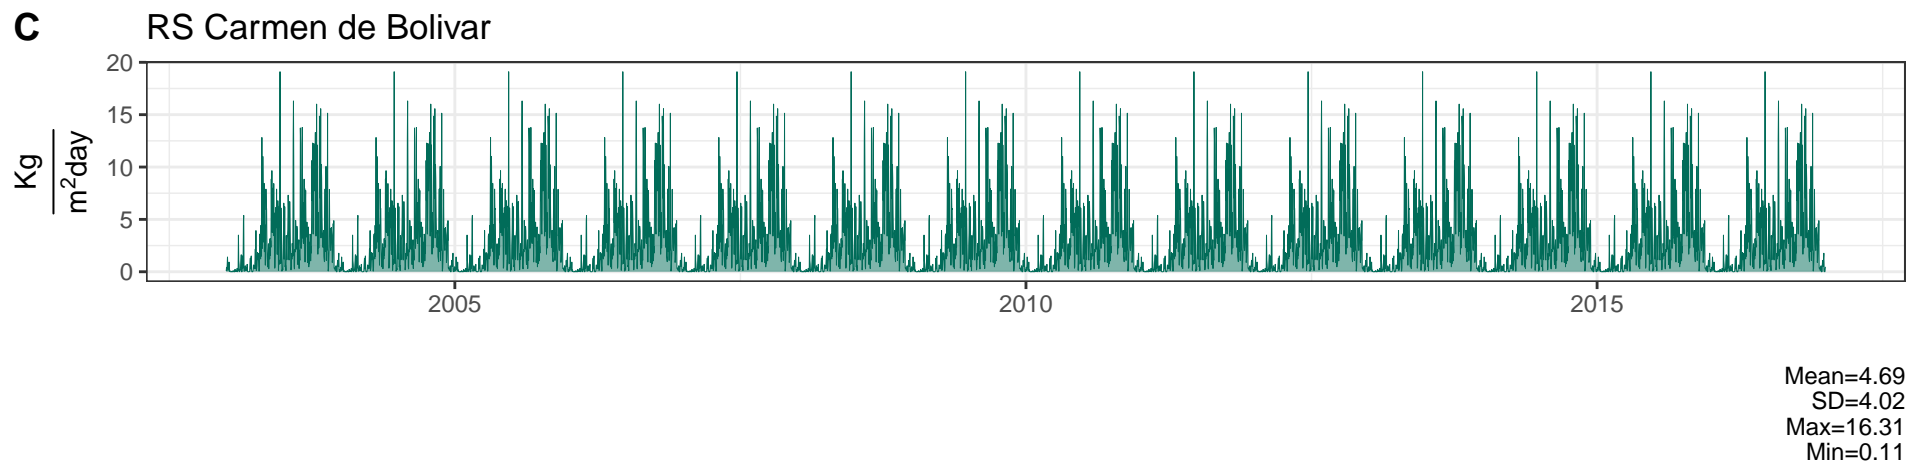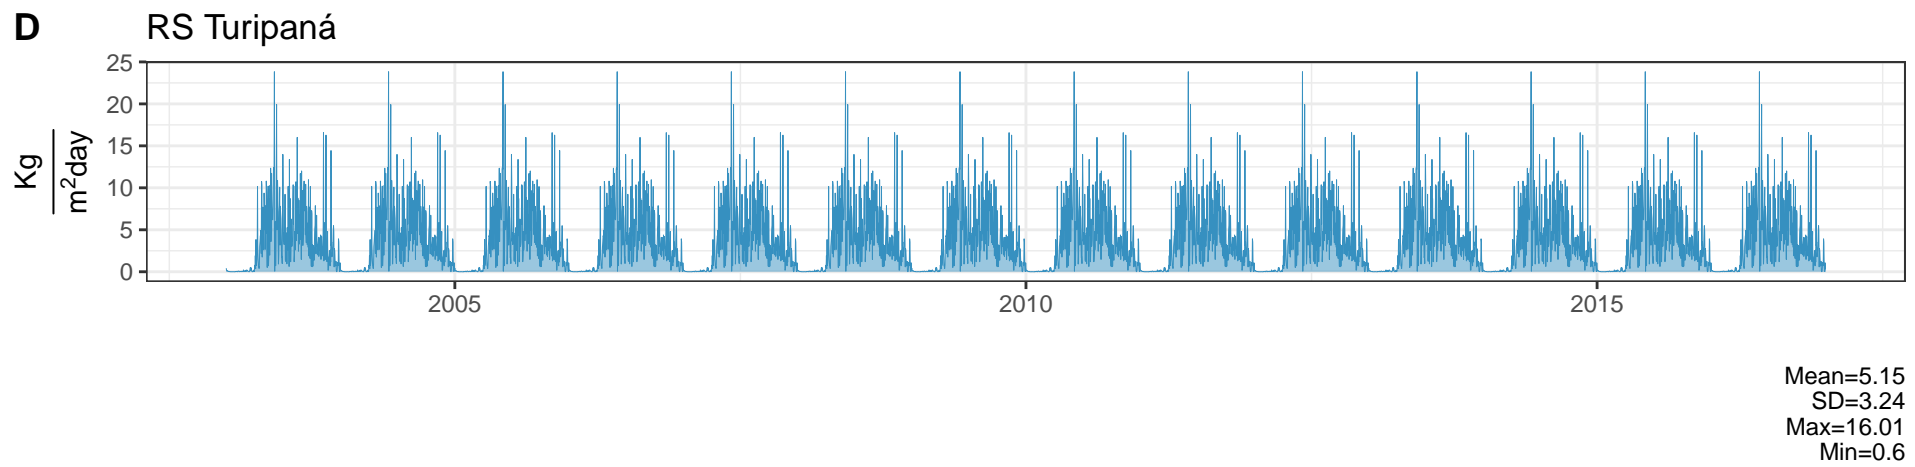

Supplement: s1 [file s1 › Figure S1.pdf]

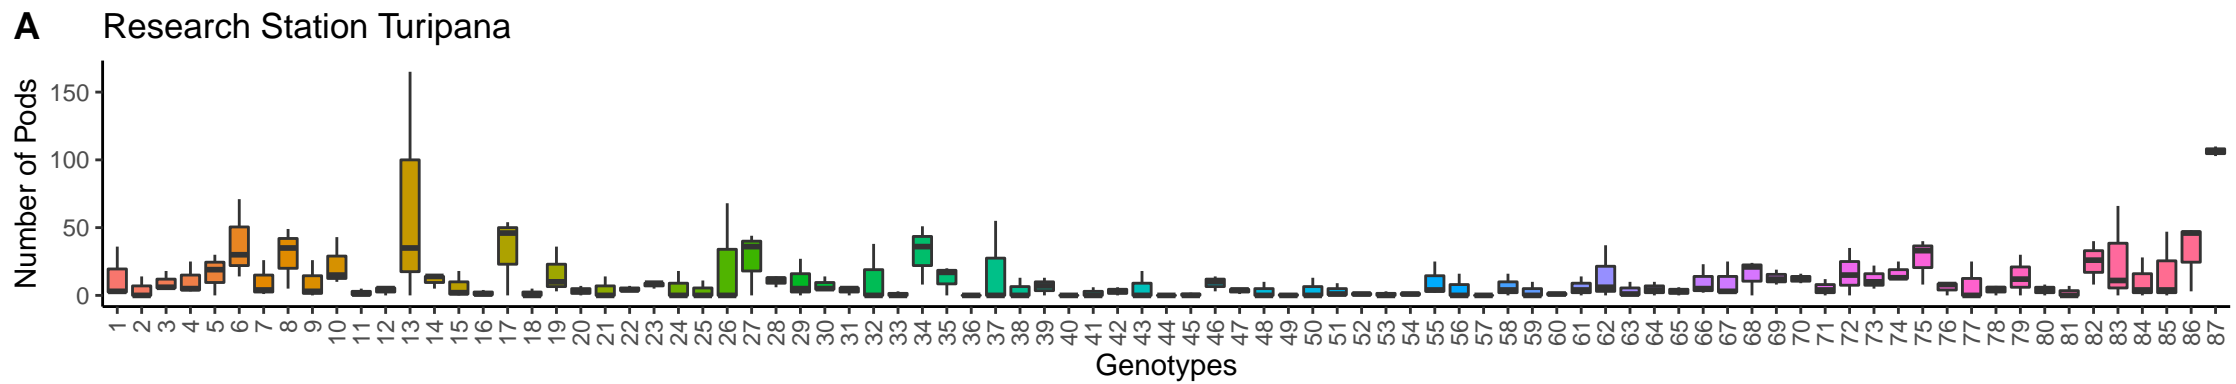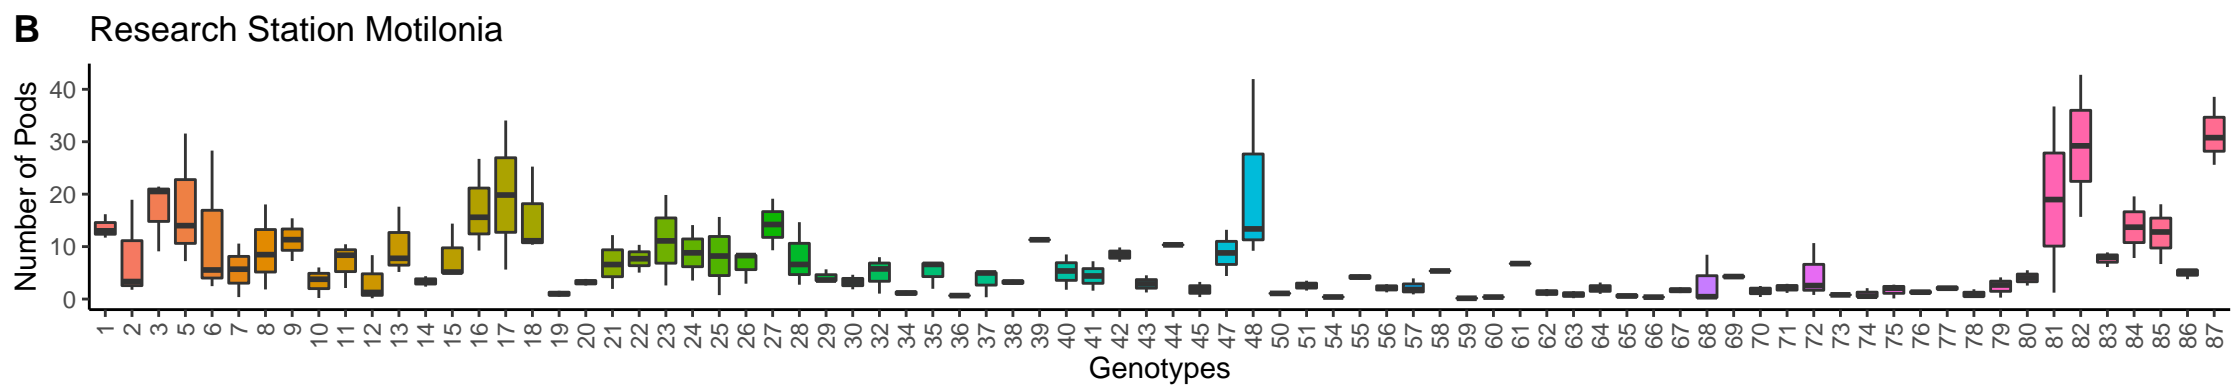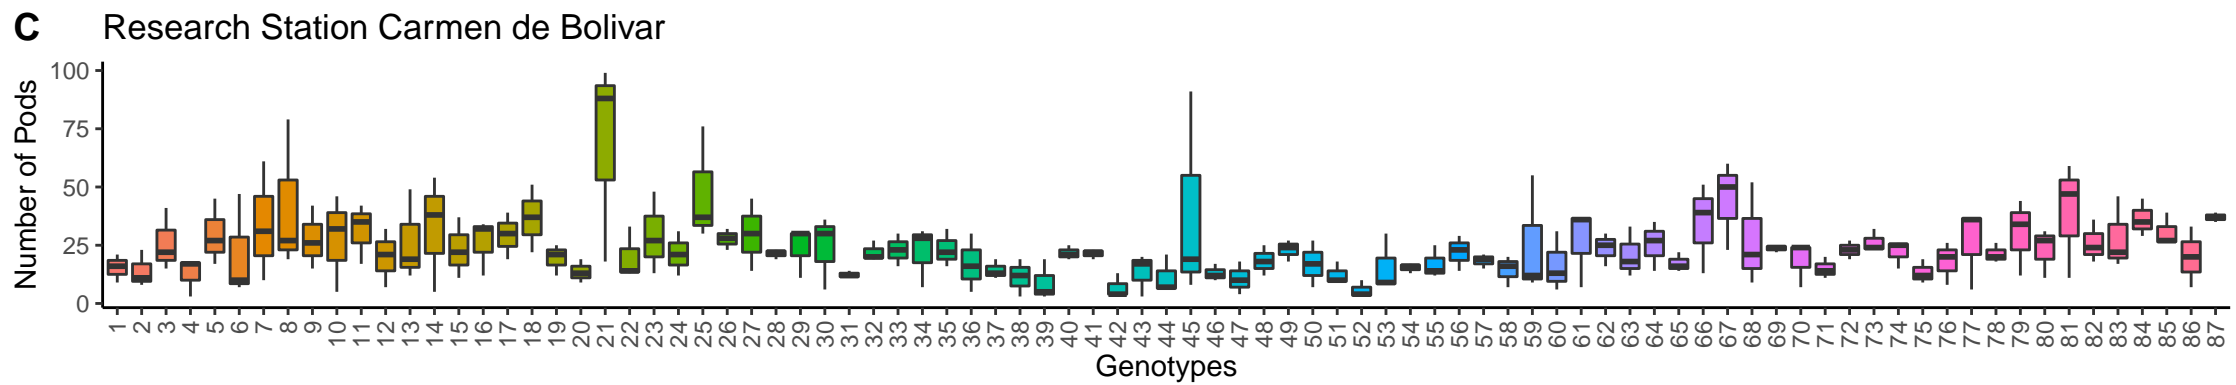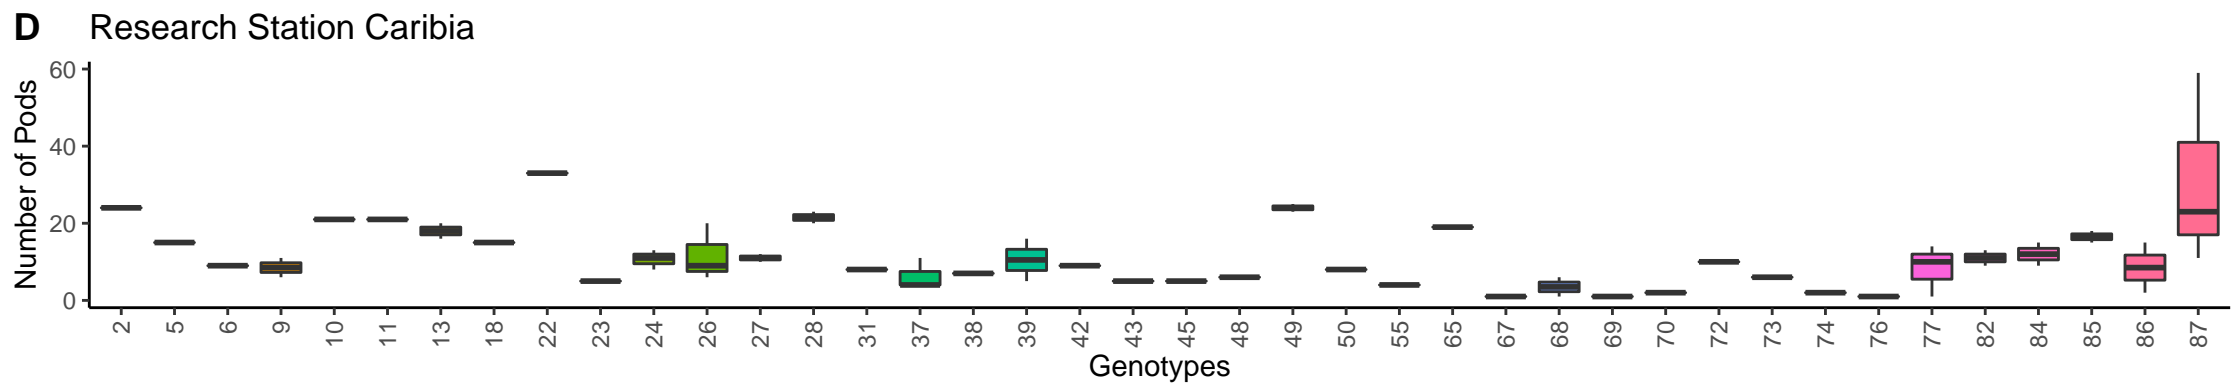

Supplement: s1 [file s1 › Figure S2.pdf]

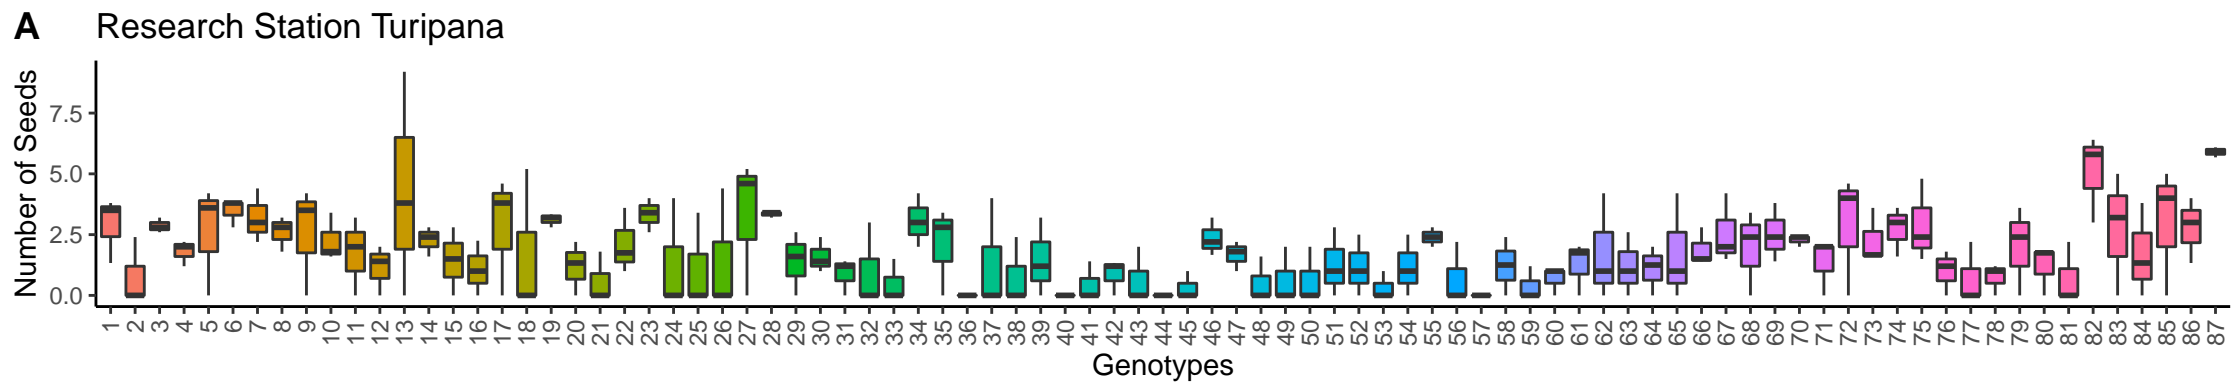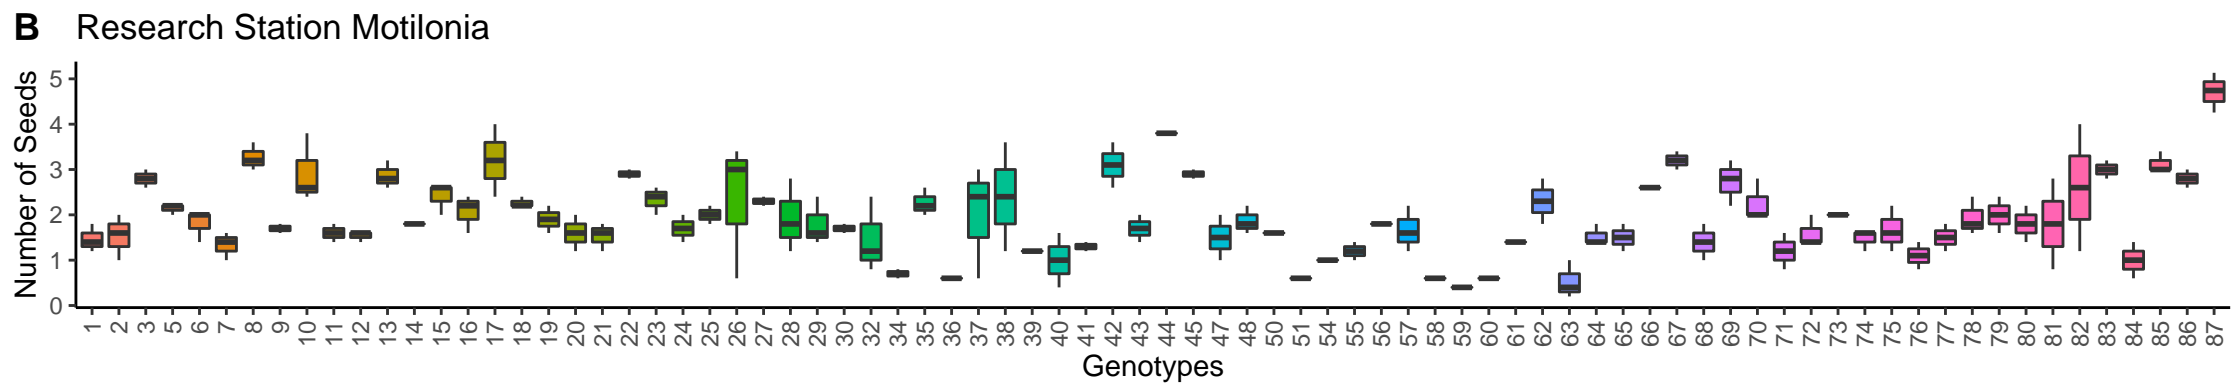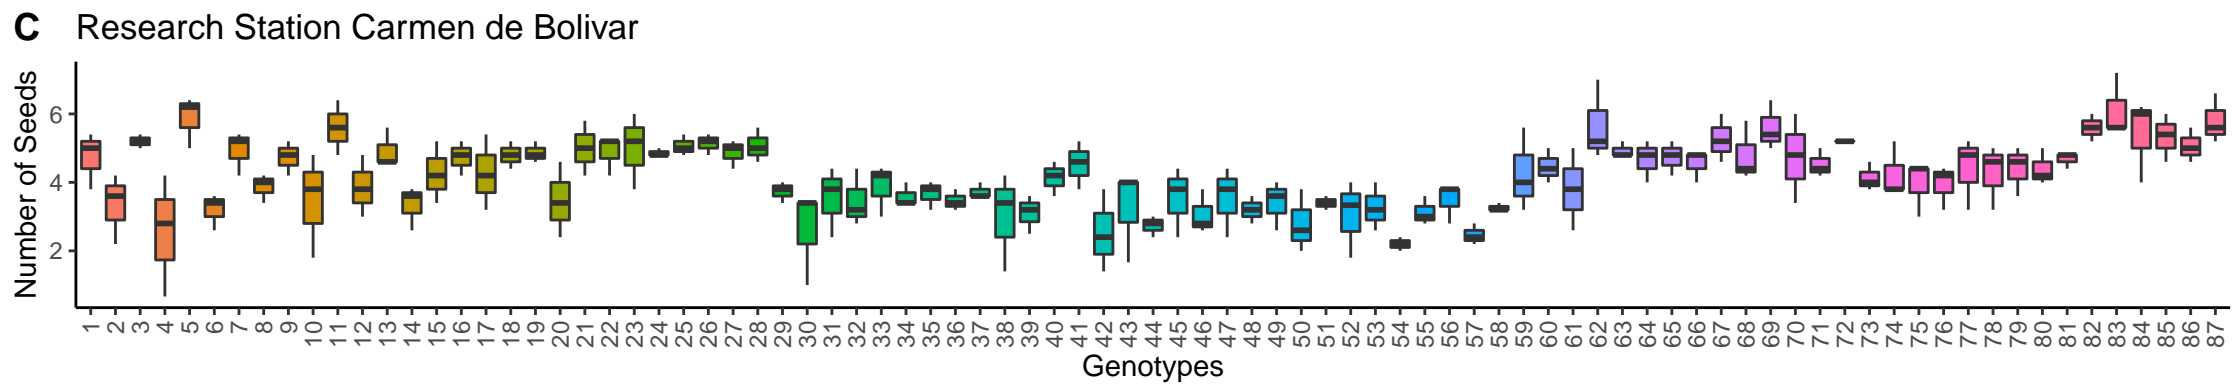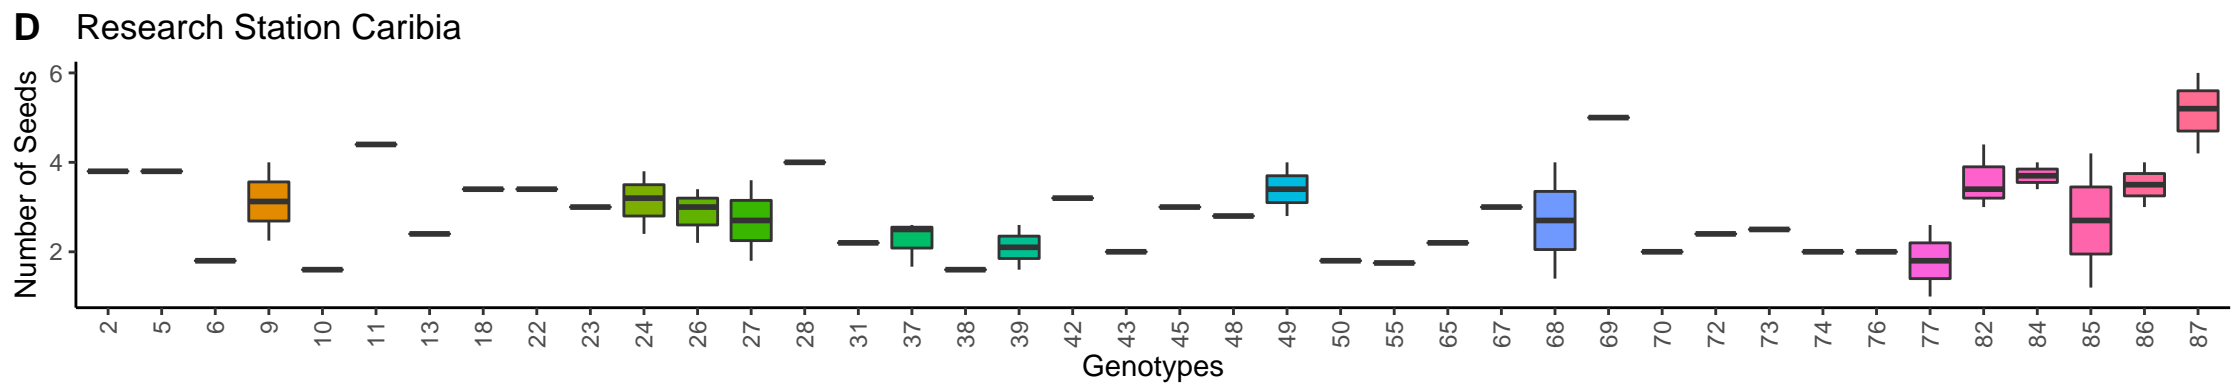

Supplement: s1 [file s1 › Figure S3.pdf]

**A** Research Station Motilonia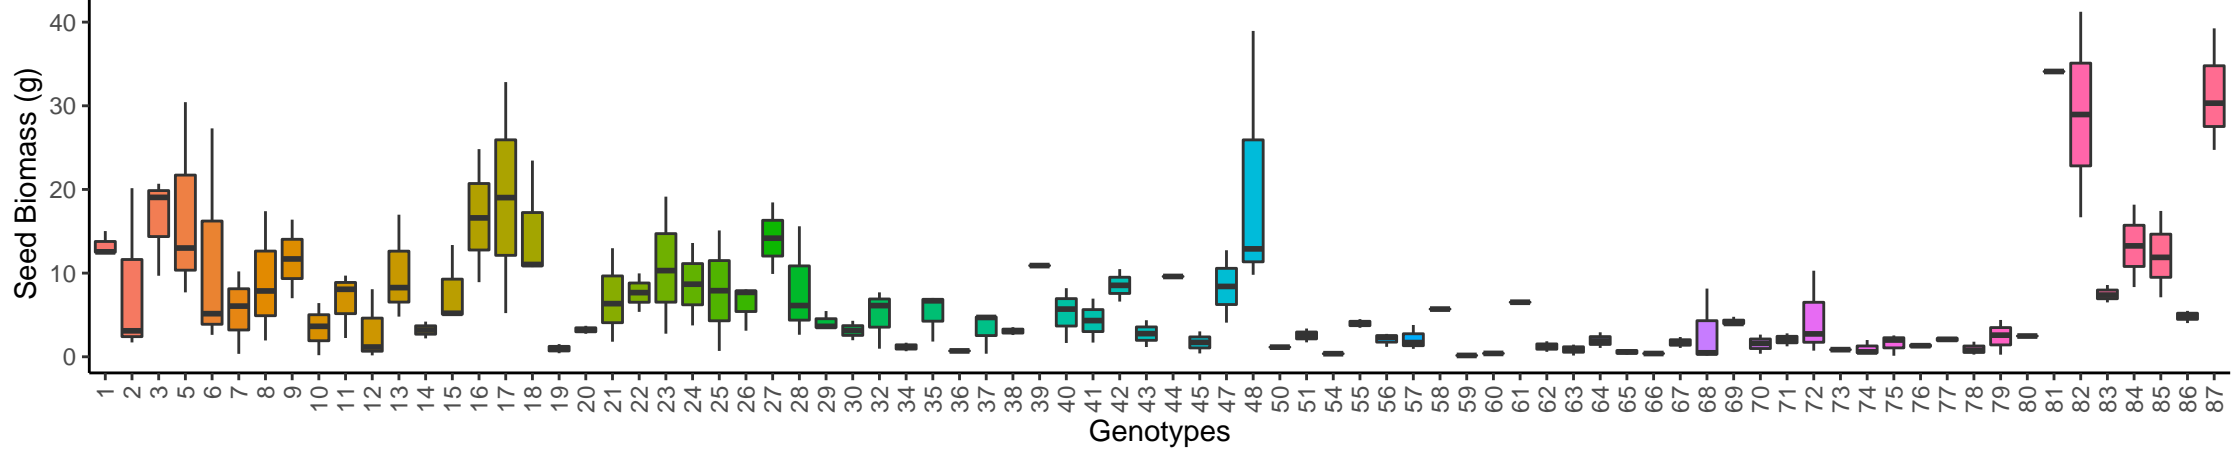**B** Research Station Carmen de Bolivar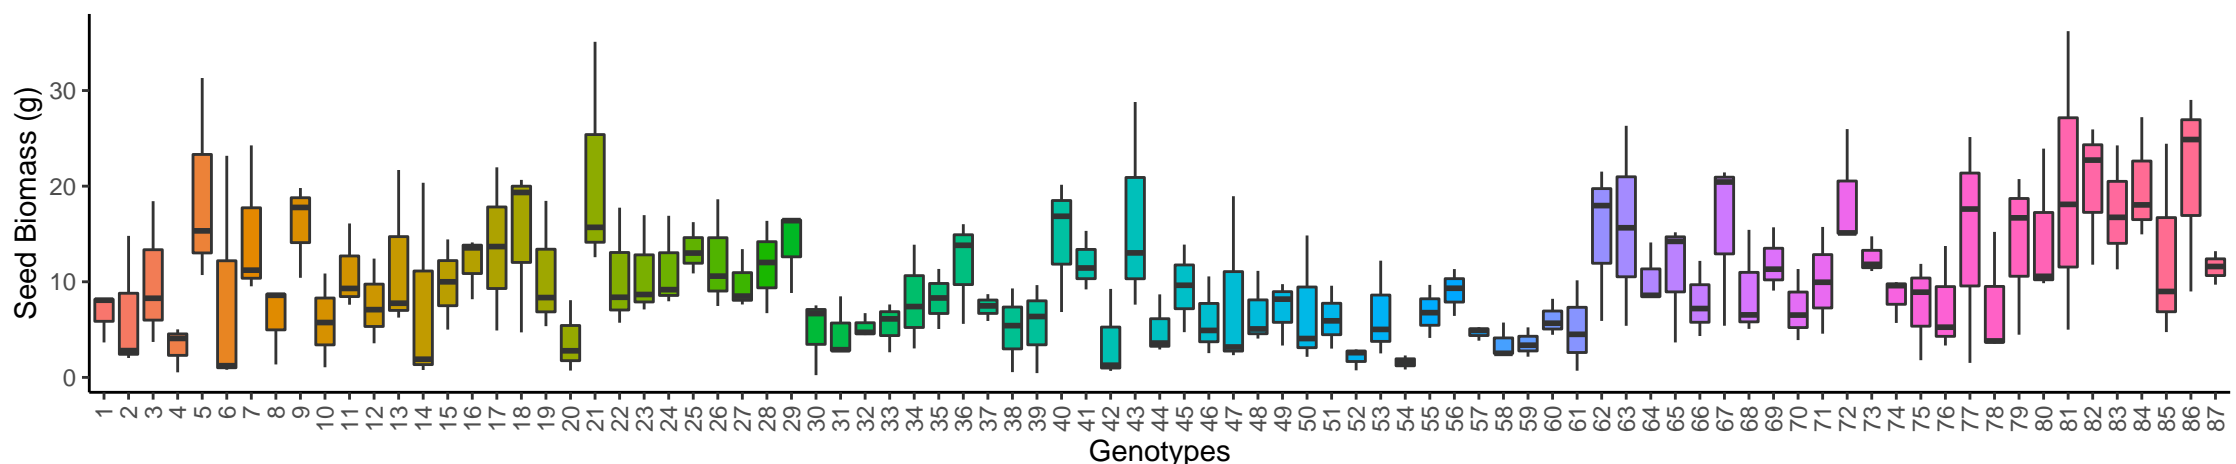**C** Research Station Caribia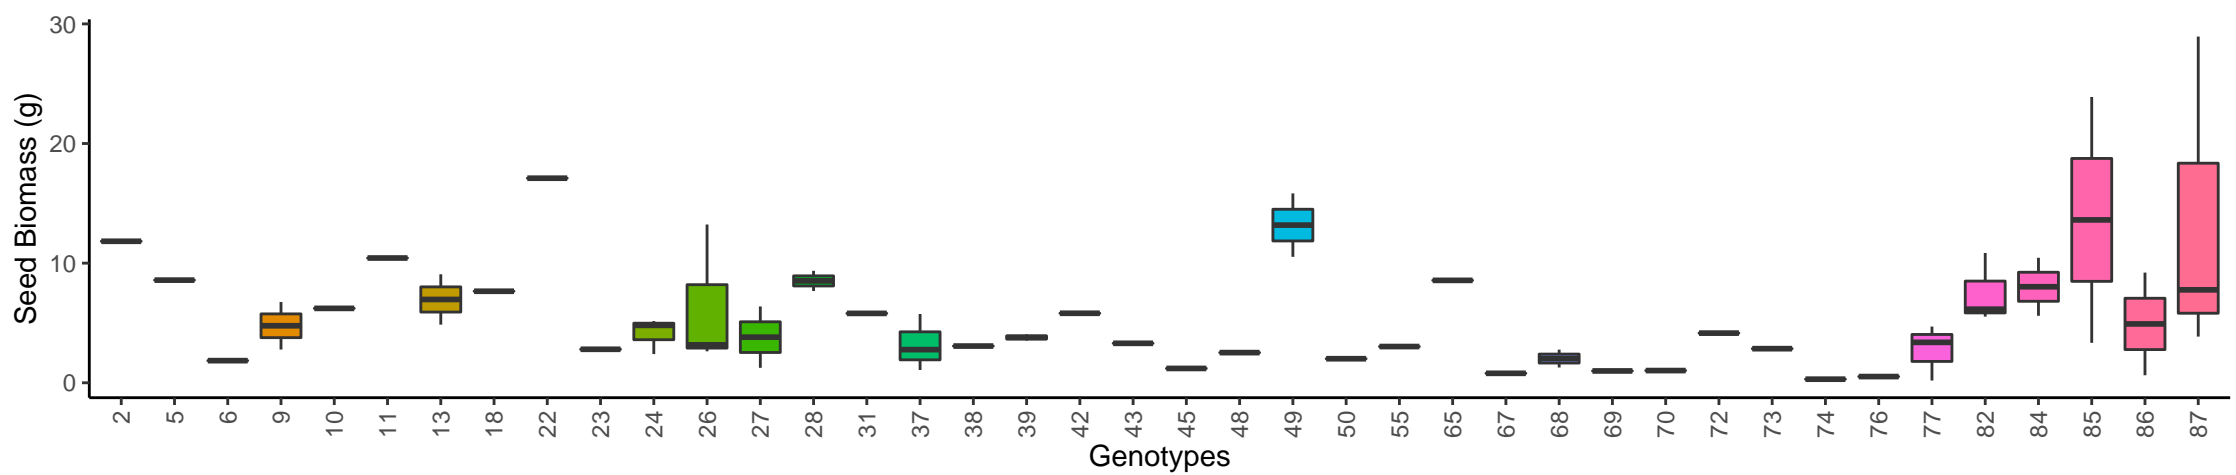

Supplement: s1 [file s1 › Figure S5.pdf]

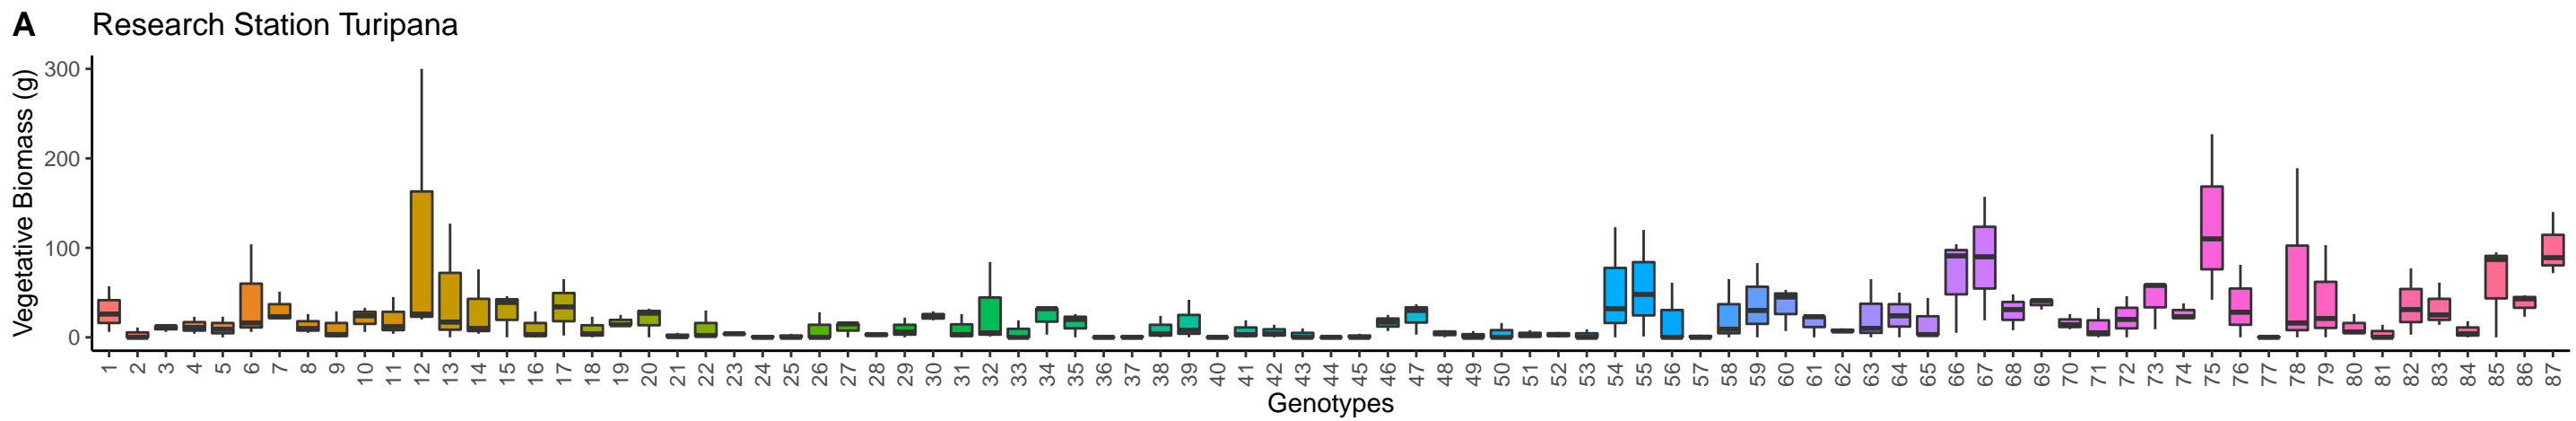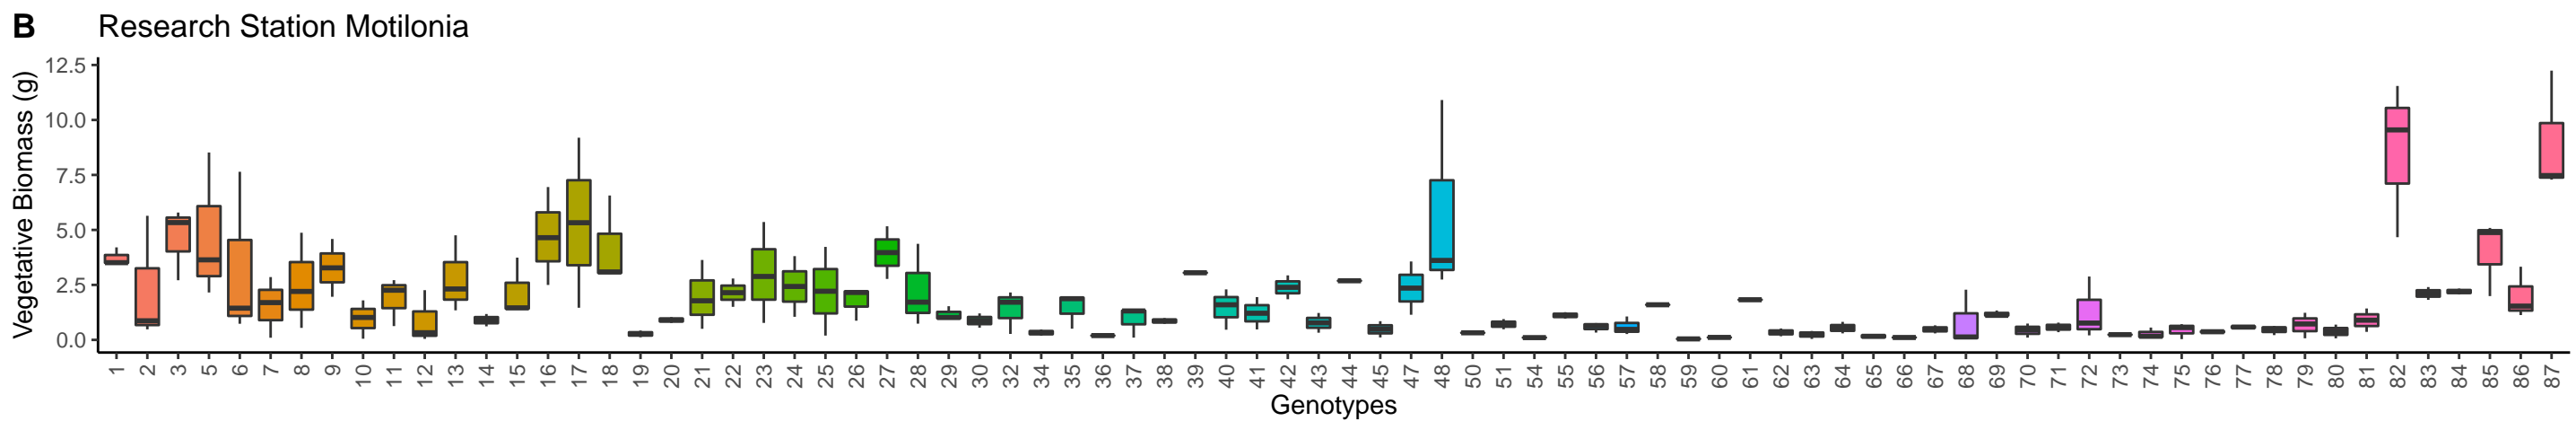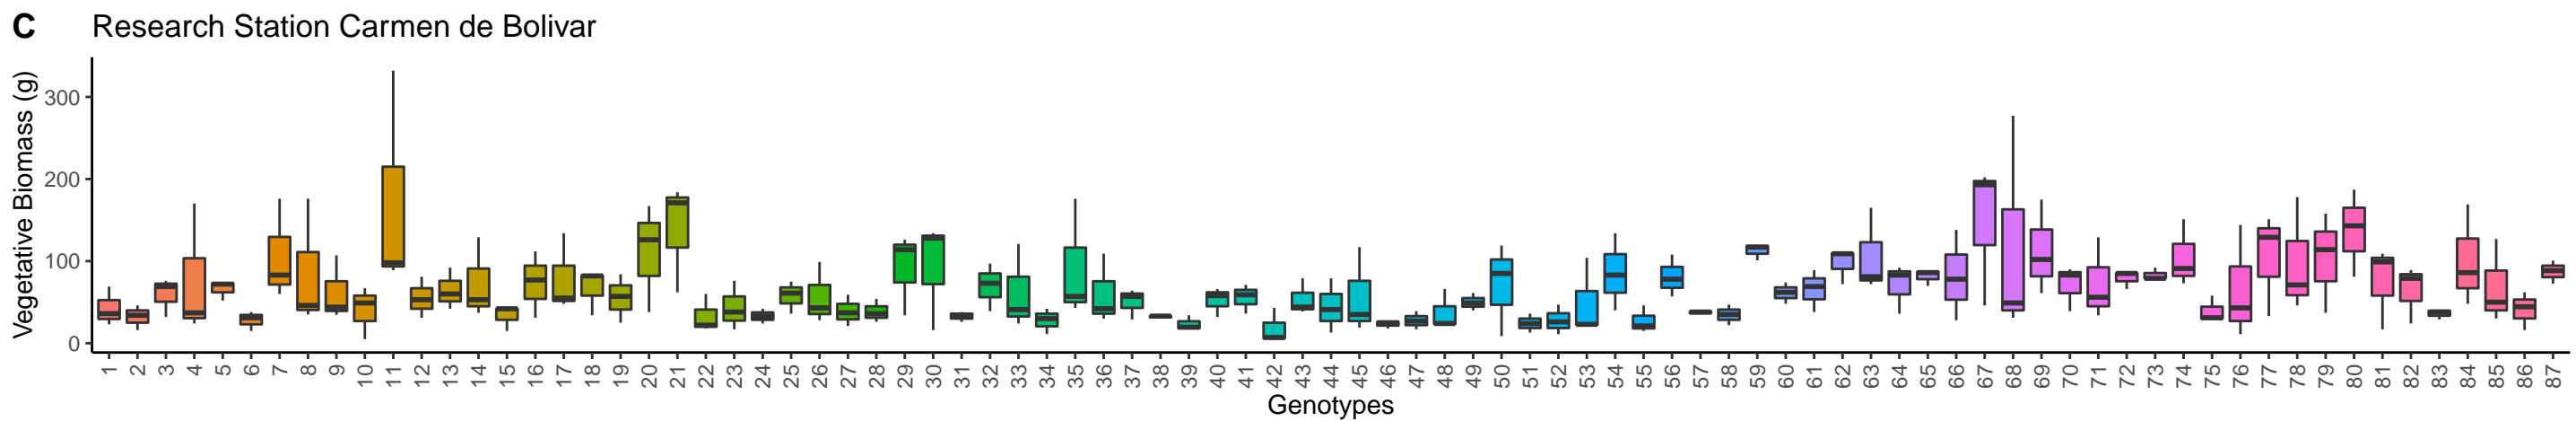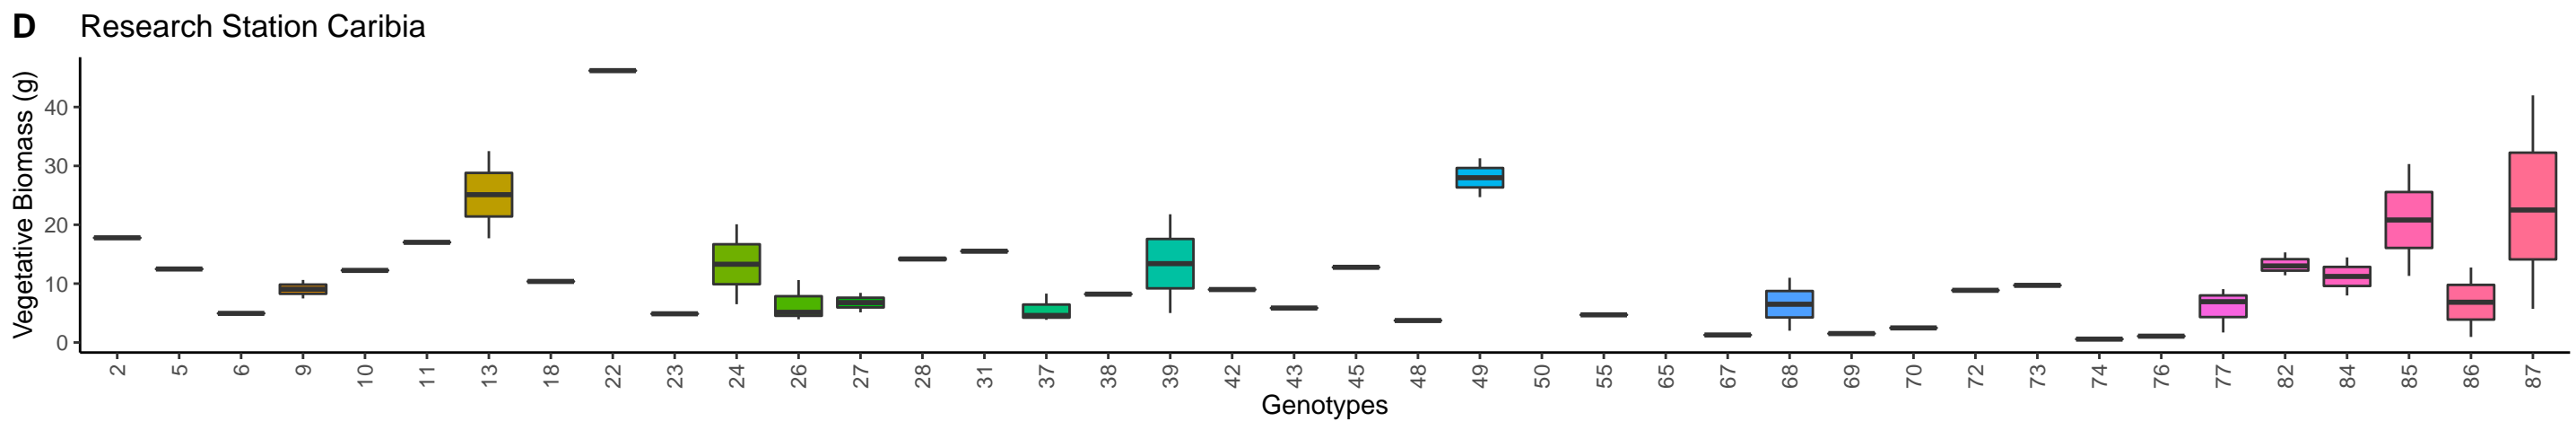

Supplement: s1 [file s1 › Figure S6.pdf]

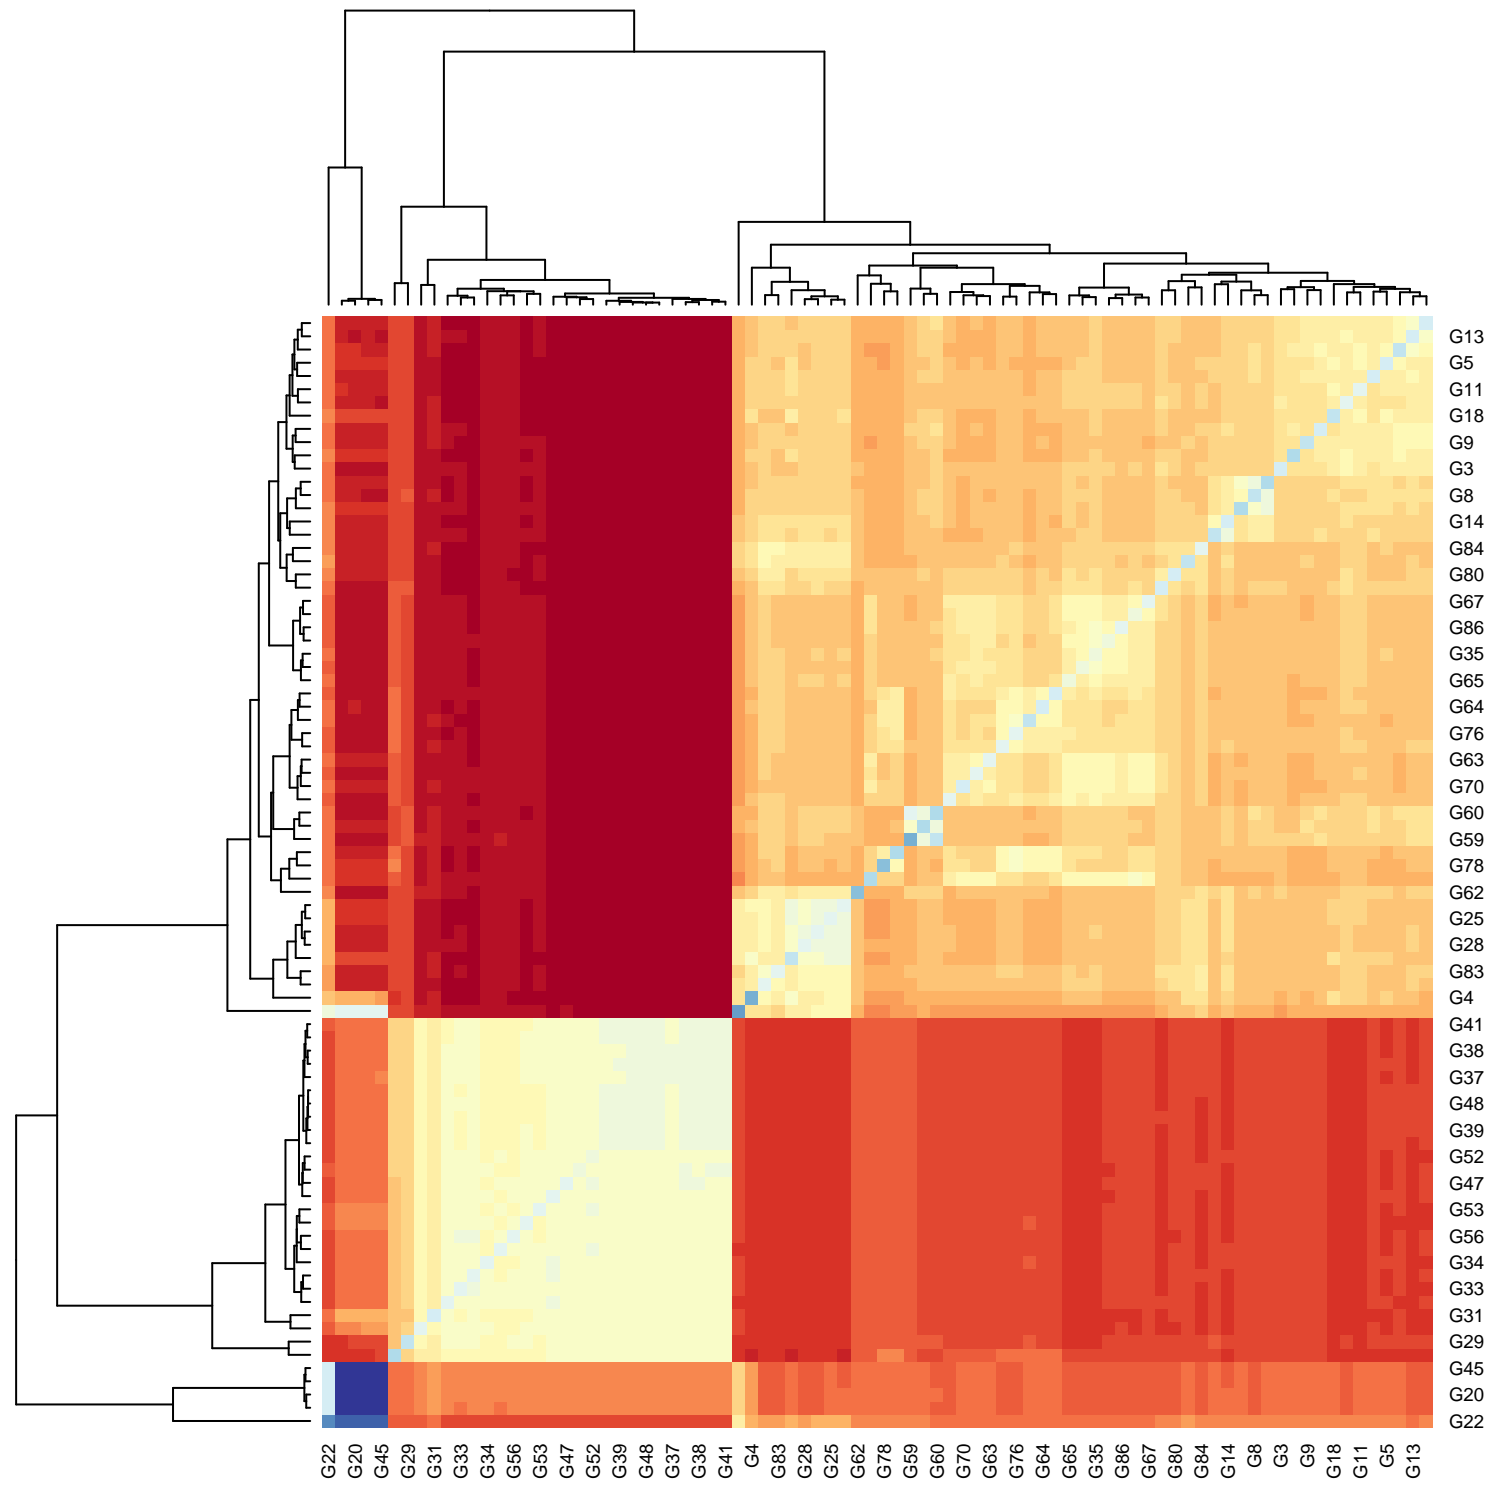

Supplement: s1 [file s1 › Figure S7.pdf]

A

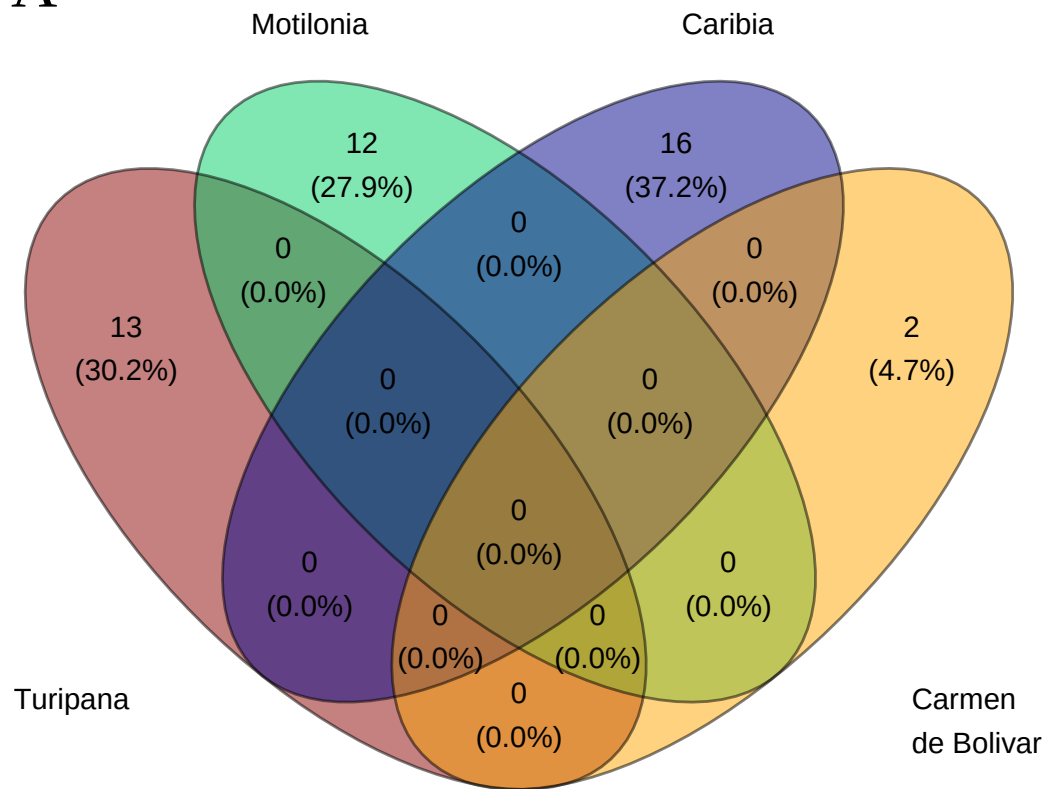

B

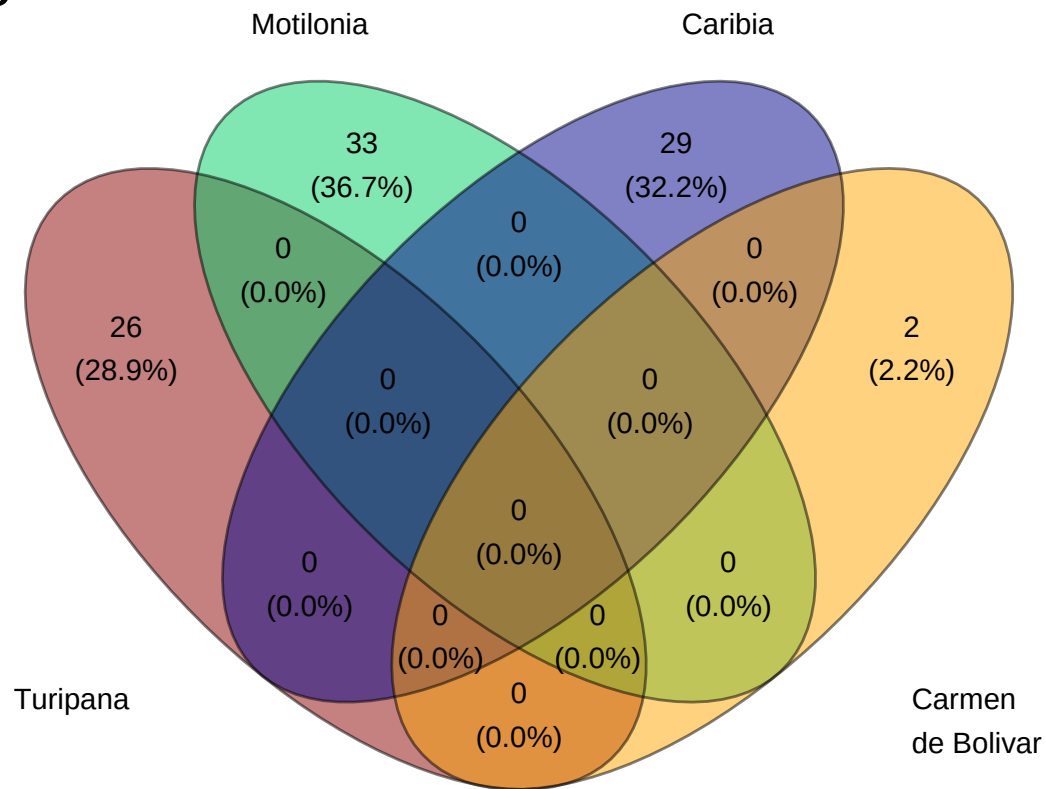

Supplement: s1 [file s1 › Figure S9.pdf]
